# Supplementary material for: Ruthenium-catalyzed synthesis of 1,3,5-triazin-2(1H)-ones and dihydro[1,3,5]triazino[1,2-a]benzimidazoles from alcohols and guanides
Source: Royal Society of Chemistry journal article supplement (doi:10.1039/c8nj02035c), 2018-01-01

## Supporting Information

For

### Ruthenium-Catalyzed Synthesis of 6-amino-1,3,5-triazin-2(1H)-ones and 3,4-dihydro[1,3,5]triazino[1,2-a]benzimidazole-2-amines from alcohols and guanides

Ming Zeng<sup>a,b</sup>, Zhong Pao Xie<sup>a,b</sup>, Dong-Mei Cui<sup>\*a,b</sup>, and Chen Zhang<sup>\*c</sup>

<sup>a</sup>*Institute of Drug Development & Chemical Biology, Zhejiang University of Technology, Hangzhou 310014, China*

<sup>b</sup>*College of Pharmaceutical Science, Zhejiang University of Technology, Hangzhou 310014, China*

<sup>c</sup>*School of Pharmaceutical Sciences, Zhejiang University, Hangzhou 310058, China*

E-mail Address: [cuidongmei@zjut.edu.cn](mailto:cuidongmei@zjut.edu.cn)

## Experimental Section

Under otherwise noted, materials were obtained from commercial suppliers and used without further purification. Thin layer chromatography (TLC) was performed using silica gel 60 F254 and visualized using UV light. Column chromatography was performed with silica gel (mesh 300e400). <sup>1</sup>H NMR and <sup>13</sup>C NMR spectra were recorded on a Bruker Avance 500 MHz spectrometer in CDCl<sub>3</sub> and DMSO-*d*<sub>6</sub> with Me<sub>4</sub>Si as an internal standard. Data were reported as follows: chemical shift in parts per million ( $\delta$ ), multiplicity (s = singlet, d = doublet, t = triplet, q = quartet, br = broad, and m = multiplet), coupling constant in Hertz (Hz) and integration. IR spectra were recorded on an FT-IR spectrometer and only major peaks are reported in cm<sup>-1</sup>. HRMS and mass data were recorded by ESI on a TOF mass spectrometer.

### General Procedure for Synthesis of 1, 3, 5-triazines:

To a mixture of alcohols (0.5 mmol), guanides (0.75 mmol), and *t*-BuOK (1.5 mmol) in dioxane (3 mmol) was added RuCl<sub>2</sub>(COD) (2 mol%). The resulting mixture in a tube reactor

was then sealed and stirred for 20 h at 100 °C. After completion of the reaction, MeOH was added and filtered. The crude residue was obtained after evaporation of the solvent in vacuum, and the residue was purified by flash chromatography with CH<sub>2</sub>Cl<sub>2</sub> and CH<sub>3</sub>OH as eluents to give the pure product.

**4-phenyl-6-(phenylamino)-1,3,5-triazin-2(5H)-one (3a)**

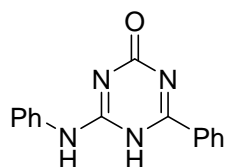

White solid; Mp: >300°C [lit.<sup>1</sup> 331-335°C]; <sup>1</sup>H NMR (500 MHz, DMSO-*d*<sub>6</sub>) δ 12.25 (br, 1H), 10.12 (br, 1H), 8.19 (d, *J* = 7.6 Hz, 2H), 8.00-7.74 (m, 2H), 7.68 (t, *J* = 7.6 Hz, 1H), 7.59 (t, *J* = 7.6 Hz, 2H), 7.35 (t, *J* = 7.4 Hz, 2H), 7.08 (t, *J* = 7.4 Hz, 1H).

**4-(phenylamino)-6-(p-tolyl)-1,3,5-triazin-2(5H)-one (3b)**

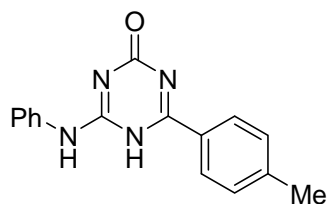

White solid; Mp: >300°C [lit.<sup>1</sup> 350°C]; <sup>1</sup>H NMR (500 MHz, DMSO-*d*<sub>6</sub>) δ 12.18 (br, 1H), 10.03 (br, 1H), 8.18 (d, *J* = 7.8 Hz, 2H), 7.73-7.69 (m, 2H), 7.67 (t, *J* = 7.4 Hz, 1H), 7.58 (t, *J* = 7.4 Hz, 2H), 7.16 (d, *J* = 7.8 Hz, 2H), 2.29 (s, 3H).

**4-(4-methoxyphenyl)-6-(phenylamino)-1,3,5-triazin-2(5H)-one (3c)**

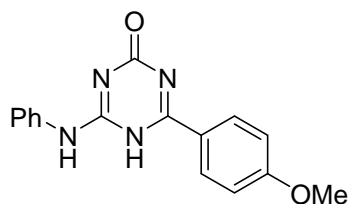

White solid; Mp: >300°C; IR(KBr, cm<sup>-1</sup>): 3444, 1666, 1605, 1538, 1445, 1360, 1262, 1179, 799; <sup>1</sup>H NMR (500 MHz, DMSO-*d*<sub>6</sub>) δ 12.09 (br, 1H), 10.02 (br, 1H), 8.21 (d, *J* = 8.9 Hz, 2H), 7.85-7.67 (m, 2H), 7.34 (t, *J* = 7.3 Hz, 2H), 7.13 (d, *J* = 8.9 Hz, 2H), 7.07 (t, *J* = 7.3 Hz, 1H), 3.87 (s, 3H); <sup>13</sup>C NMR (150 MHz, DMSO-*d*<sub>6</sub>) δ 164.1, 163.7, 163.2, 156.7, 139.4, 130.5, 129.0, 123.7, 123.1, 121.0, 114.7, 56.1. HRMS (ESI) *m/z* [M+H]<sup>+</sup> calcd for C<sub>16</sub>H<sub>15</sub>N<sub>4</sub>O<sub>2</sub> 295.1195, found 295.1192.

**4-(2-methoxyphenyl)-6-(phenylamino)-1,3,5-triazin-2(5H)-one (3d)**

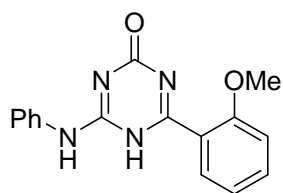

White solid; Mp: 238-240 °C; IR(KBr,  $\text{cm}^{-1}$ ): 3444, 1697, 1644, 1589, 1489, 1232, 746;  $^1\text{H}$  NMR (500 MHz,  $\text{DMSO}-d_6$ )  $\delta$  11.69 (br, 1H), 10.12 (br, 1H), 7.84 (d,  $J = 7.8$  Hz, 2H), 7.75 (d,  $J = 7.4$  Hz, 1H), 7.60 (t,  $J = 7.8$ , 1H), 7.34 (t,  $J = 7.8$  Hz, 2H), 7.22 (d,  $J = 7.4$  Hz, 1H), 7.12 (t,  $J = 7.4$  Hz, 1H), 7.07 (t,  $J = 7.4$  Hz, 1H), 3.89 (s, 3H);  $^{13}\text{C}$  NMR (150 MHz,  $\text{DMSO}-d_6$ )  $\delta$  164.1, 163.9, 158.0, 155.8, 139.3, 134.0, 130.7, 129.0, 123.7, 121.0, 120.9, 120.5, 112.6, 56.4. HRMS (ESI)  $m/z$   $[\text{M}+\text{H}]^+$  calcd for  $\text{C}_{16}\text{H}_{15}\text{N}_4\text{O}_2$  295.1195, found 295.1190.

#### 4-(3,4-dimethoxyphenyl)-6-(phenylamino)-1,3,5-triazin-2(5H)-one (3e)

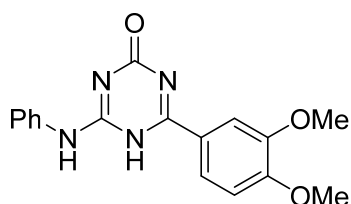

White solid; Mp: >300 °C; IR(KBr,  $\text{cm}^{-1}$ ): 3418, 2935, 1693, 1601, 1568, 1497, 1441, 1274, 1128, 1021, 792;  $^1\text{H}$  NMR (500 MHz,  $\text{DMSO}-d_6$ )  $\delta$  12.11 (br, 1H), 10.02 (br, 1H), 8.26-7.69 (m, 4H), 7.41-7.25 (m, 2H), 7.16 (d,  $J = 8.3$  Hz, 1H), 7.10-7.05 (m, 1H), 3.87 (s, 6H);  $^{13}\text{C}$  NMR (125 MHz,  $\text{DMSO}$ )  $\delta$  163.7, 163.6, 161.4, 153.0, 148.6, 139.0, 128.5, 123.2, 122.0, 120.6, 120.5, 111.4, 110.8, 55.8, 55.7. HRMS (ESI)  $m/z$   $[\text{M}+\text{H}]^+$  calcd for  $\text{C}_{17}\text{H}_{17}\text{N}_4\text{O}_3$  325.1301, found 325.1313.

#### 4-(2,3-dimethoxyphenyl)-6-(phenylamino)-1,3,5-triazin-2(5H)-one (3f)

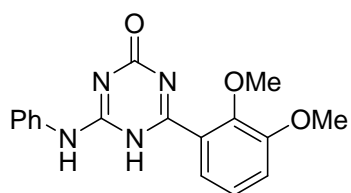

White solid; Mp: 214-216 °C; IR(KBr,  $\text{cm}^{-1}$ ): 3470, 3414, 1692, 1615, 1384, 1268, 1071, 934;  $^1\text{H}$  NMR (500 MHz,  $\text{DMSO}-d_6$ )  $\delta$  11.86 (br, 1H), 10.12 (br, 1H), 7.84 (d,  $J = 7.2$  Hz, 2H), 7.34 (t,  $J = 7.2$  Hz, 2H), 7.29 (dd,  $J = 7.0, 2.8$  Hz, 1H), 7.24-7.21 (m, 2H), 7.07 (t,  $J = 7.0$  Hz, 1H), 3.88 (s, 3H), 3.82 (s, 3H);  $^{13}\text{C}$  NMR (125 MHz,  $\text{DMSO}-d_6$ )  $\delta$  164.2, 163.9, 155.7, 152.9, 147.4, 139.3, 128.9, 126.9, 124.6, 123.8, 121.4, 121.1, 116.6, 61.7, 56.6. HRMS (ESI)  $m/z$   $[\text{M}+\text{H}]^+$  calcd for  $\text{C}_{17}\text{H}_{17}\text{N}_4\text{O}_3$  325.1301, found 325.1311.

**4-(benzo[d][1,3]dioxol-5-yl)-6-(phenylamino)-1,3,5-triazin-2(5H)-one (3g)**

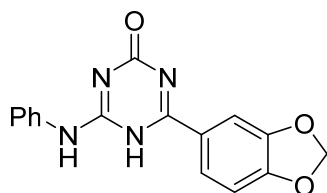

White solid; Mp: >300°C; IR(KBr, cm<sup>-1</sup>): 3365, 3034, 1698, 1573, 1477, 1444, 1383, 1263, 1037, 798; <sup>1</sup>H NMR (500 MHz, DMSO-*d*<sub>6</sub>) δ 12.07 (br, 1H), 10.01 (br, 1H), 8.06-7.58 (m, 4H), 7.48-7.24 (m, 2H), 7.21-7.00 (m, 2H), 6.18 (s, 2H); <sup>13</sup>C NMR (150 MHz, DMSO-*d*<sub>6</sub>) δ 164.0, 163.9, 156.7, 152.0, 148.3, 139.4, 129.0, 124.7, 124.2, 123.7, 121.0, 108.9, 108.0, 102.7. HRMS (ESI) m/z [M+H]<sup>+</sup> calcd for C<sub>16</sub>H<sub>13</sub>N<sub>4</sub>O<sub>3</sub> 309.0988, found 309.0985.

**4-(3-chlorophenyl)-6-(phenylamino)-1,3,5-triazin-2(5H)-one (3h)**

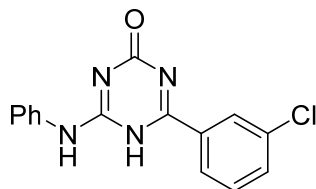

White solid; Mp: >300°C; IR(KBr, cm<sup>-1</sup>): 3478, 1705, 1615, 1571, 1481, 1384, 1074, 787; <sup>1</sup>H NMR (500 MHz, DMSO-*d*<sub>6</sub>) δ 12.33(br, 1H), 10.16(br, 1H), 8.34-8.21(m, 1H), 8.15 (d, *J* = 7.1 Hz, 1H), 7.85-7.45(m, 3H), 7.63(t, *J* = 7.5 Hz, 1H), 7.46-7.24 (m, 2H), 7.17-7.01 (m, 1H); <sup>13</sup>C NMR (125 MHz, DMSO-*d*<sub>6</sub>/CDCl<sub>3</sub>) δ 164.1, 163.5, 157.1, 155.4, 138.9, 134.2, 132.8, 130.7, 128.8, 128.4, 126.9, 123.9, 121.4. HRMS (ESI) m/z [M+H]<sup>+</sup> calcd for C<sub>15</sub>H<sub>12</sub>ClN<sub>4</sub>O 299.0700, found 299.0696.

**4-phenyl-6-(*p*-tolylamino)-1,3,5-triazin-2(5H)-one (3i)<sup>2</sup>**

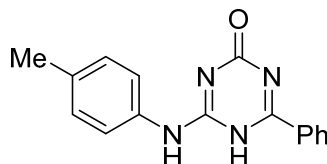

White solid; Mp: >300°C; <sup>1</sup>H NMR (500 MHz, DMSO-*d*<sub>6</sub>) δ 12.18 (br, 1H), 10.03 (br, 1H), 8.18 (d, *J* = 7.8 Hz, 2H), 7.73-7.69 (m, 2H), 7.67 (t, *J* = 7.4 Hz, 1H), 7.58 (t, *J* = 7.4 Hz, 2H), 7.16 (d, *J* = 7.8 Hz, 2H), 2.29 (s, 3H).

**4-(4-chlorophenyl)-6-(phenylamino)-1,3,5-triazin-2(5H)-one (3j)**

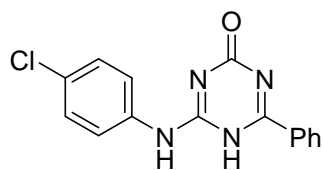

White solid; Mp: >300°C [lit.<sup>3</sup> 352 - 354°C]; <sup>1</sup>H NMR (500 MHz, DMSO-*d*<sub>6</sub>) δ 12.31 (br, 1H), 10.25 (br, 1H), 8.31-8.08 (m, 2H), 8.04-7.84 (m, 2H), 7.69-7.60 (m, 3H), 7.51-7.34 (m, 2H).

**4-((3-methoxyphenyl)amino)-6-phenyl-1,3,5-triazin-2(5H)-one (3k)**<sup>32</sup>

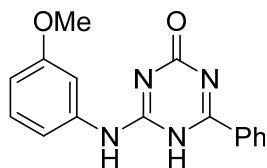

White solid; Mp: >300°C; <sup>1</sup>H NMR (500 MHz, DMSO-*d*<sub>6</sub>) δ 12.27 (br, 1H), 10.08 (br, 1H), 8.19 (d, *J* = 7.5 Hz, 2H), 7.68 (t, *J* = 7.5 Hz, 1H), 7.60-7.57 (m, 3H), 7.50-7.35 (m, 1H), 7.25 (t, *J* = 8.4 Hz, 1H), 6.67 (dd, *J* = 8.4, 2.2 Hz, 1H), 3.76 (s, 3H).

**4-(benzylamino)-6-phenyl-1,3,5-triazin-2(5H)-one (3l)**

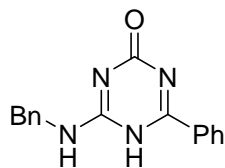

White solid; Mp: >300°C [lit.<sup>1</sup> 316-319°C]; <sup>1</sup>H NMR (500 MHz, DMSO-*d*<sub>6</sub>) δ 11.94 (br, 1H), 8.54 (br, 1H), 8.12 (m, 2H), 7.65-7.26 (m, 8H), 4.65-4.51 (m, 2H).

**4-phenyl-10,10a-dihydrobenzo[4,5]imidazo[1,2-a][1,3,5]triazin-2-amine(5a)**

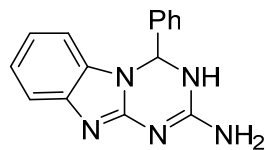

Light brown solid; Mp: 291-292°C [lit.<sup>4</sup> 294-295°C]; <sup>1</sup>H NMR (500 MHz, DMSO-*d*<sub>6</sub>) δ 8.51 (br, 1H), 7.45-7.33 (m, 5H), 7.22 (d, *J* = 7.8 Hz, 1H), 6.94 (t, *J* = 7.5 Hz, 1H), 6.87-6.71 (m, 5H).

**4-(p-tolyl)-10,10a-dihydrobenzo[4,5]imidazo[1,2-a][1,3,5]triazin-2-amine(5b)**

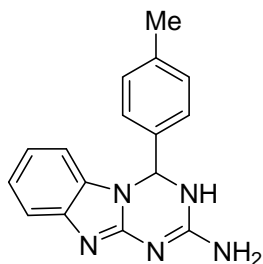

Light brown solid; Mp: 276-278°C [lit.<sup>5</sup> 278-279°C]; <sup>1</sup>H NMR (500 MHz, DMSO-*d*<sub>6</sub>) δ 8.26 (br, 1H), 7.24 (d, *J* = 8.1 Hz, 2H), 7.21-7.17 (m, 3H), 6.91 (td, *J* = 7.5 Hz, 0.9 Hz, 1H), 6.77 (t, *J* = 7.5 Hz, 1H), 6.72-6.69 (m, 2H), 6.44 (br, 2H), 2.27 (s, 3H).

**4-(2,3-dimethoxyphenyl)-10,10a-dihydrobenzo[4,5]imidazo[1,2-a][1,3,5]triazin-2-amine (5c)** (CAS: 326021-87-8)

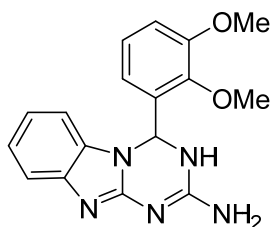

Light brown solid; Mp: 272-274°C; <sup>1</sup>H NMR (500 MHz, DMSO-*d*<sub>6</sub>) δ 7.88 (br, 1H), 7.24 (d, *J* = 7.9 Hz, 1H), 7.06 (t, *J* = 7.9 Hz, 1H), 7.01 (t, *J* = 7.9 Hz, 1H), 6.97-6.92 (m, 2H), 6.82 (t, *J* = 7.5 Hz, 1H), 6.75 (d, *J* = 7.9 Hz, 1H), 6.55 (d, *J* = 7.5 Hz, 1H), 6.37 (br, 2H), 3.81 (s, 3H), 3.79 (s, 3H).

Ref.

- (1) Kohra, S.; Ueda, K.; Tominaga, Y. *Heterocycles* **1996**, *27*, 839.
- (2) Basyouni, M. N.; El-Khamry, A. A.; El-Adly, M. M. *Egypt. J. Chem.* **1981**, *23*, 243.
- (3) Degener, E.; Schmelzer, H. G.; Holtschmidt, H. *Angew. Chem., Int. Ed. Engl.* **1966**, *5*, 960.
- (4) Dolzhenko, A. V.; Chui, W. K. *J. Heterocyclic Chem.* **2006**, *43*, 95.
- (5) Dolzhenko, A. V.; Chui, W.-K.; Dolzhenko, A. V. *J. Heterocyclic Chem.* **2006**, *43*, 1513.

170414  
ZM170411-c DMSO 0414

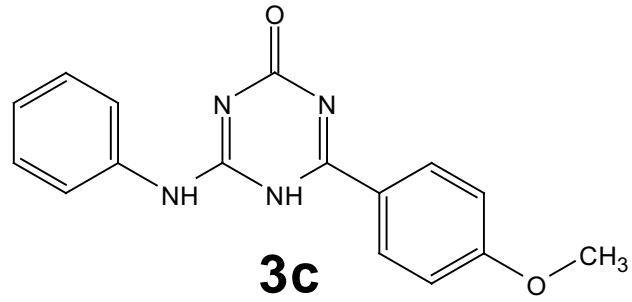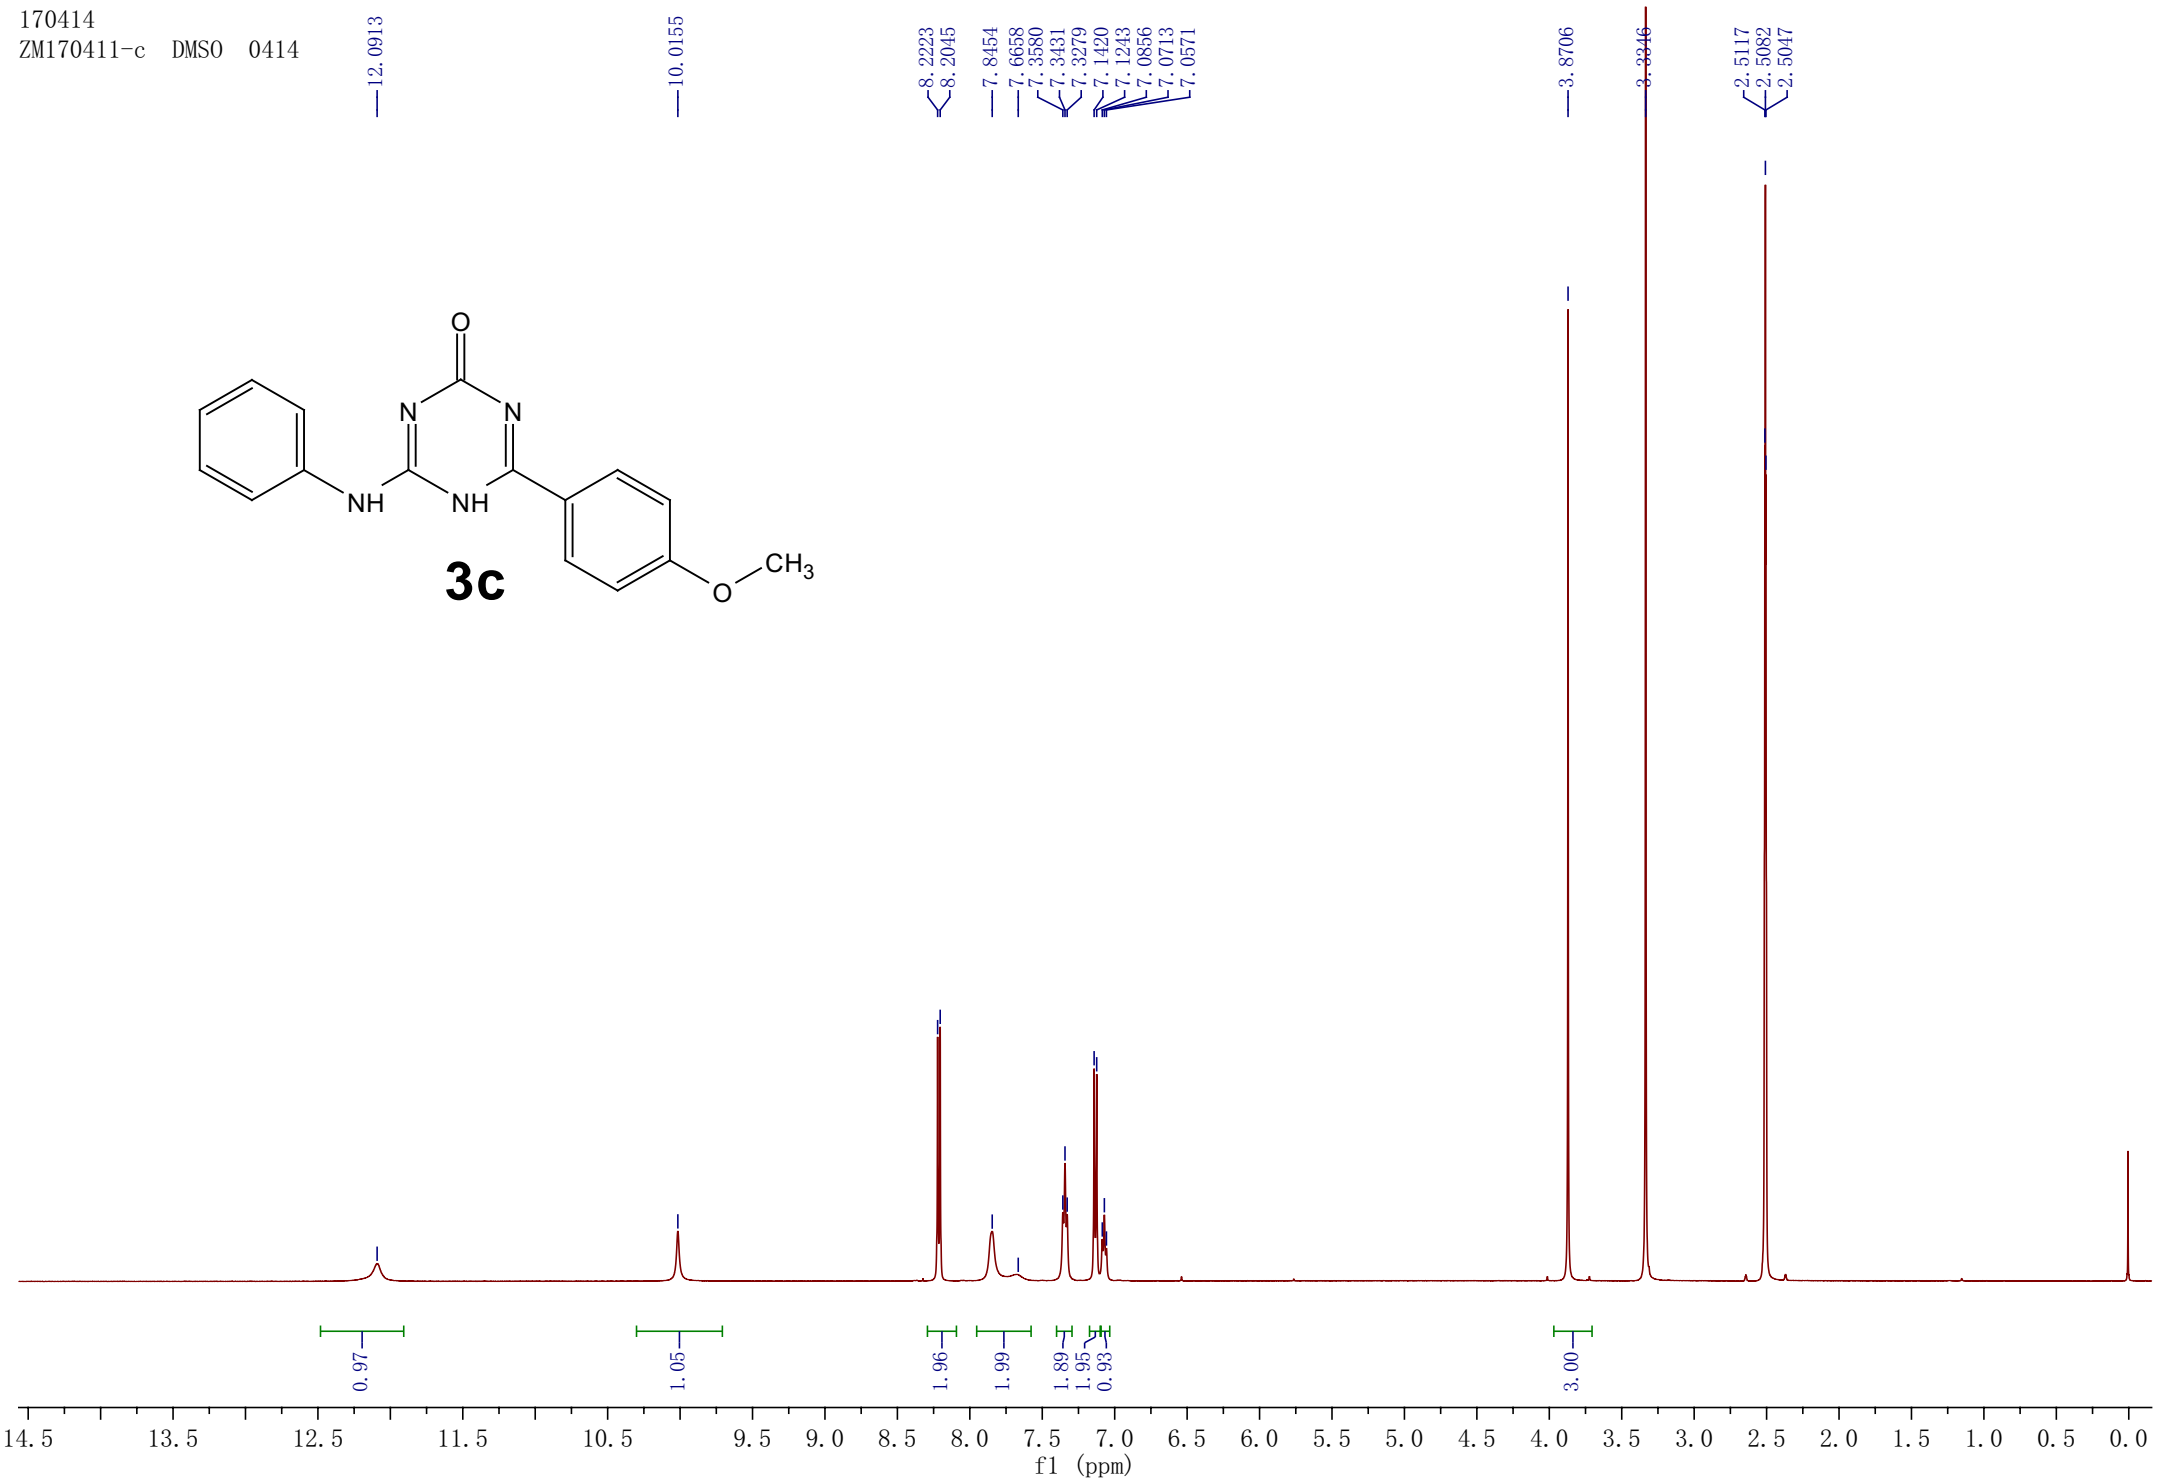

20171123-baomi-C13-WHF-ZM-02  
20171123-baomi-C13-WHF-ZM-02  
DMSO

164.4927  
163.6332  
163.1490  
156.7157  
139.4187  
130.4693  
128.9684  
123.6468  
123.0540  
121.0291  
114.6777

56.0895

40.3569  
40.2183  
40.0793  
39.6499  
39.8011  
39.6620  
39.5228

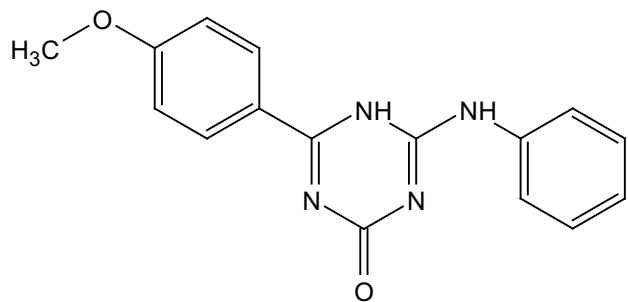

**3c**

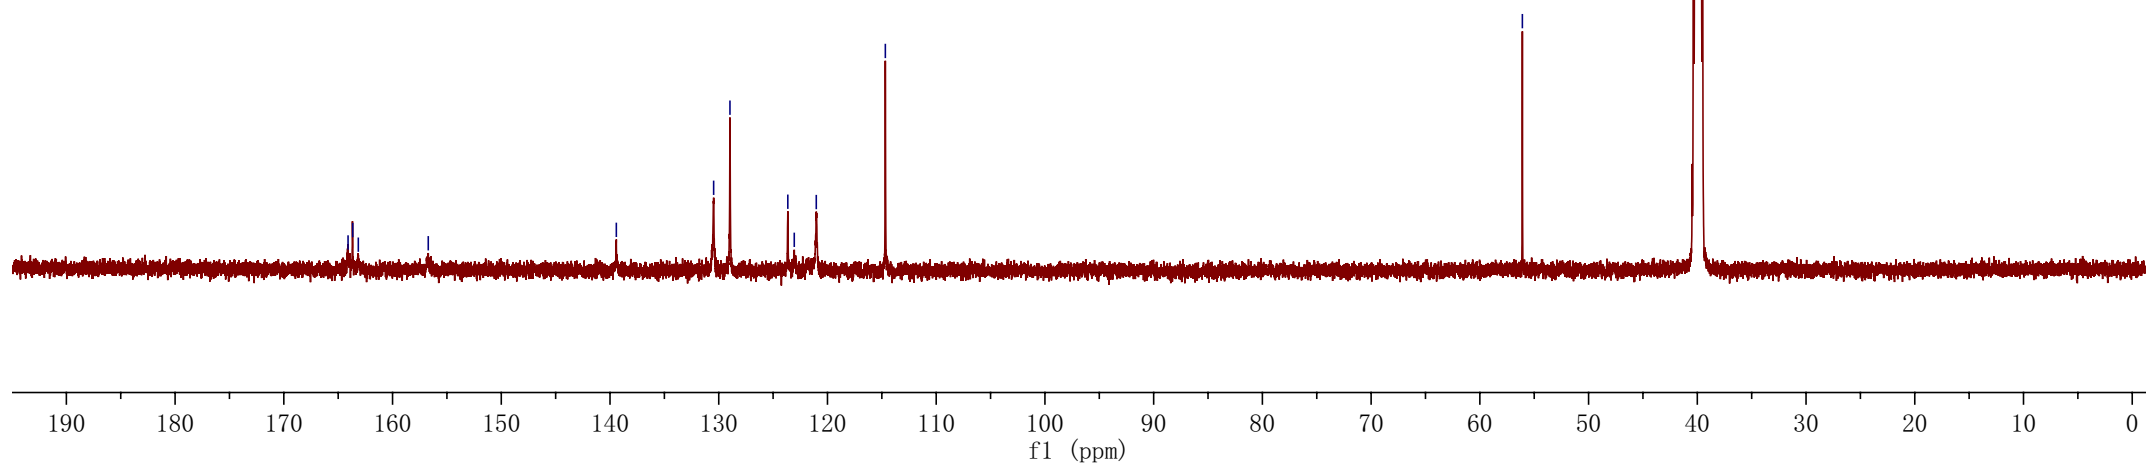



170504  
ZM170425-a DMSO 0504

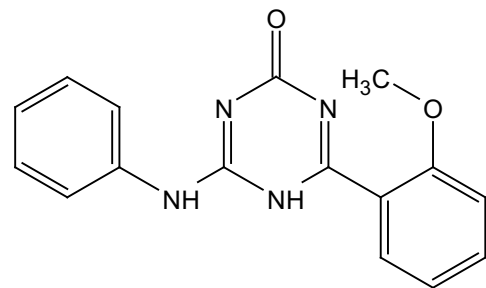

**3d**

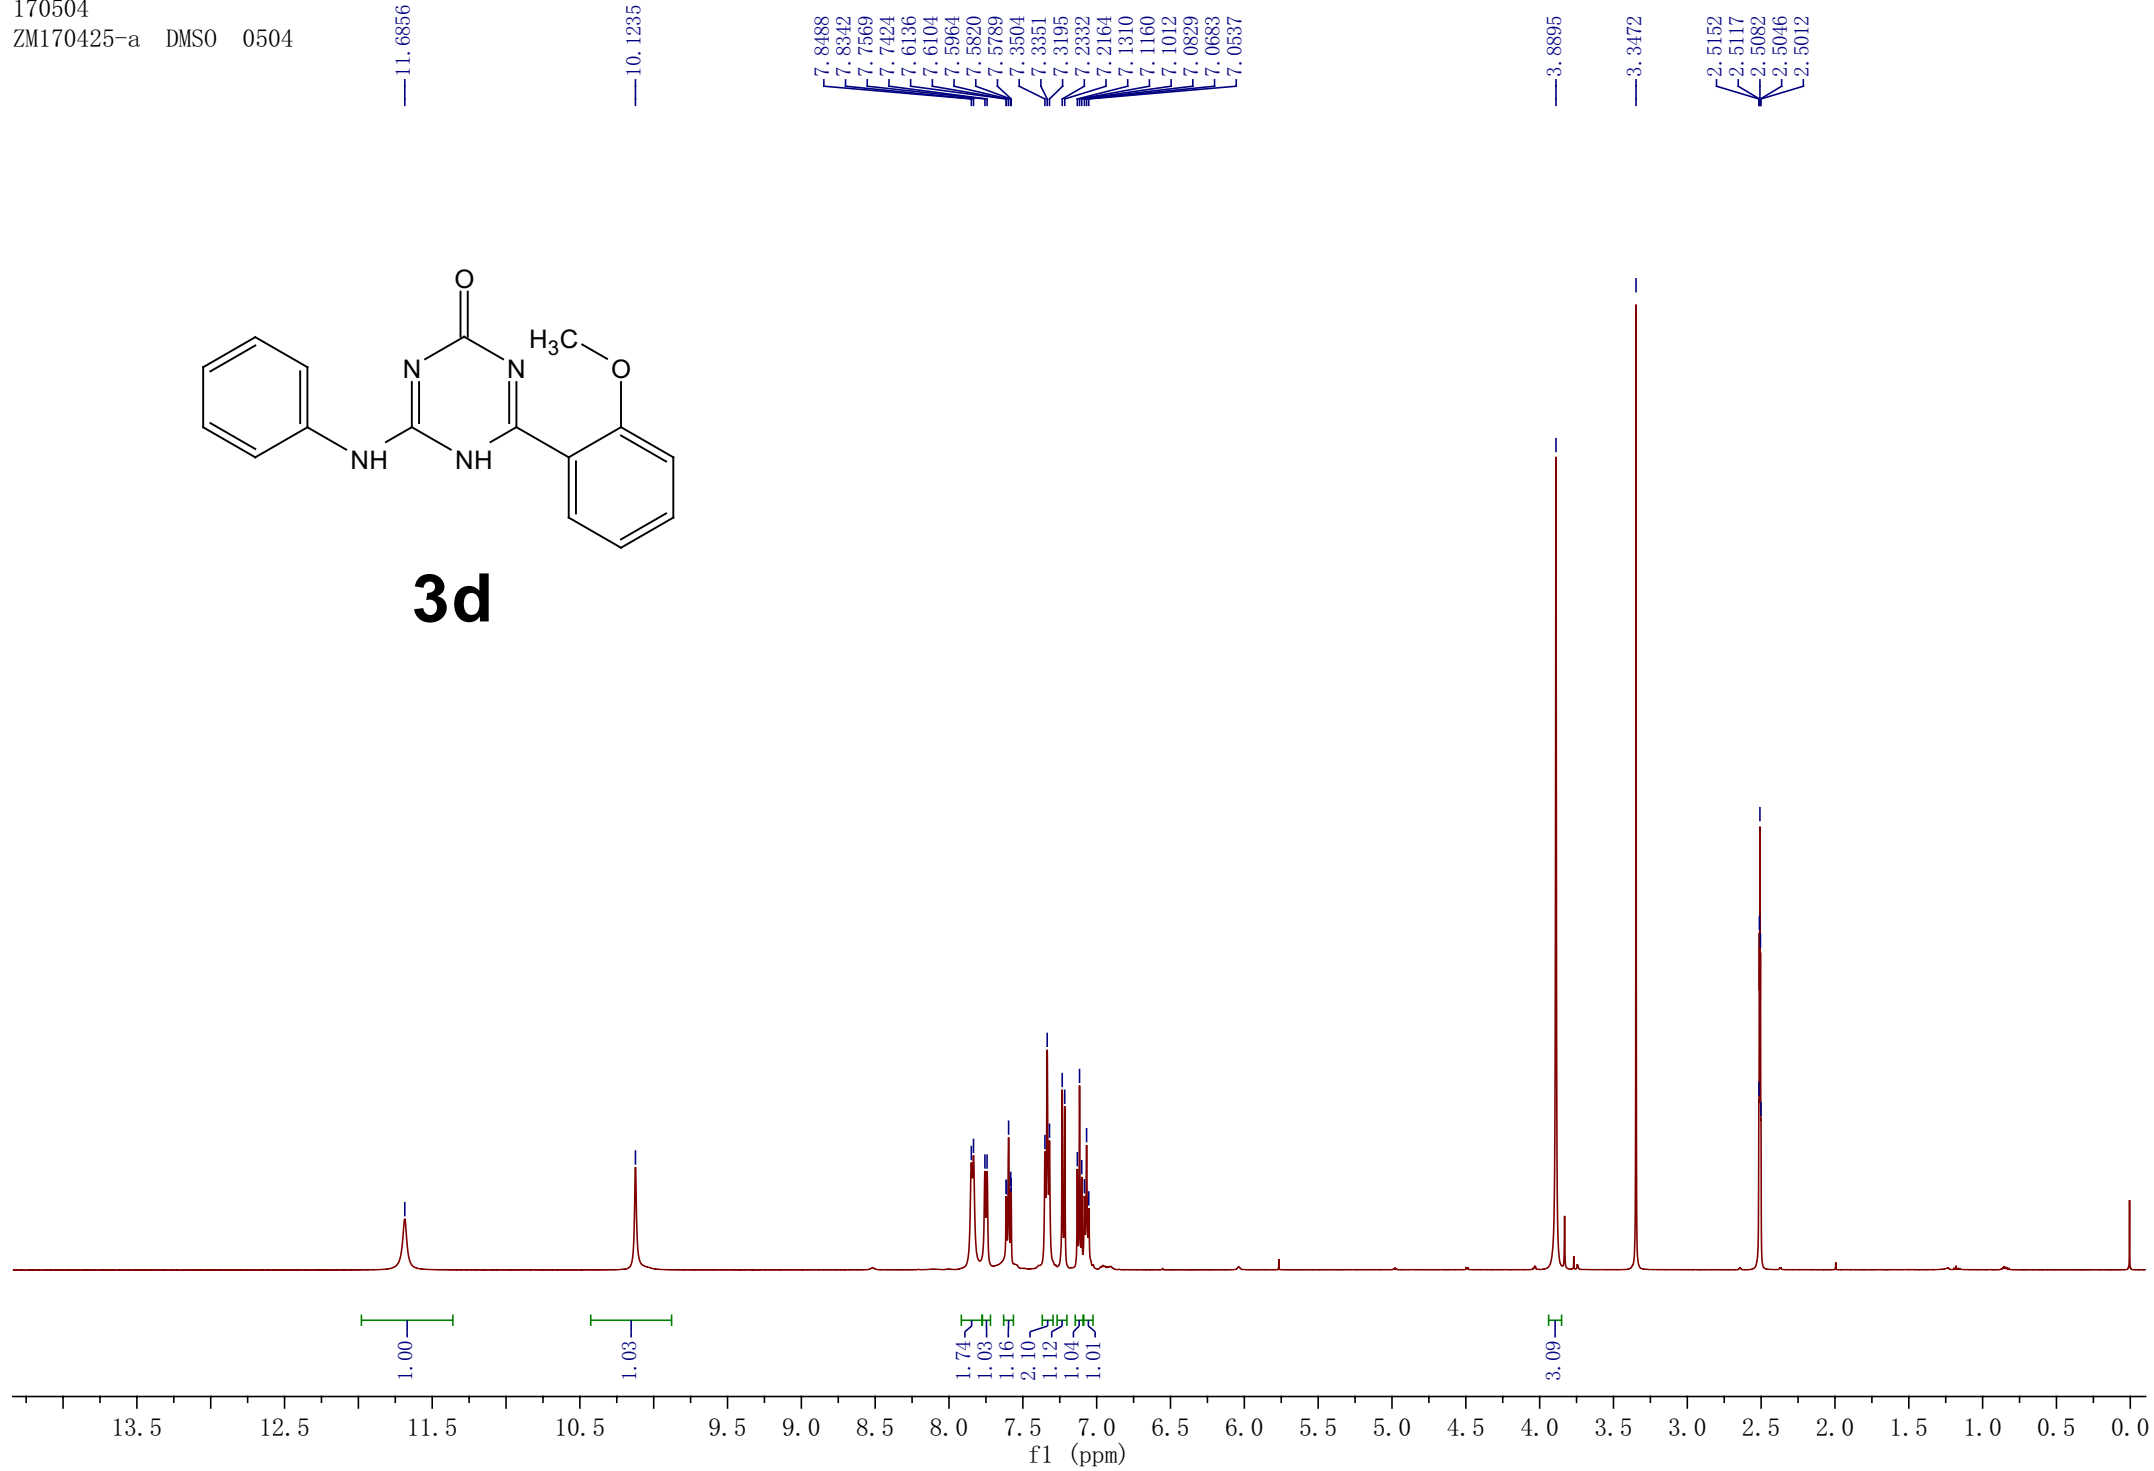

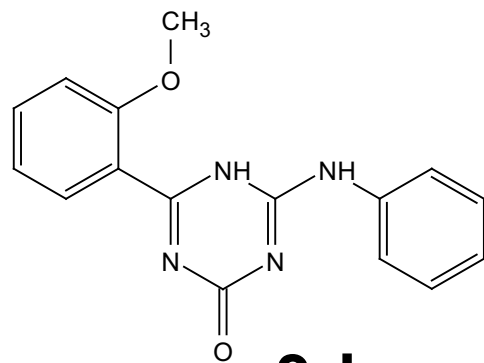**3d**

164.0866  
163.9014  
157.9649  
155.7596  
139.2845  
134.0435  
130.7019  
128.9639  
123.7401  
120.9947  
120.8892  
120.5476  
112.5796

56.3847

40.3083  
40.1690  
40.0299  
39.8908  
39.7516  
39.6124  
39.4731

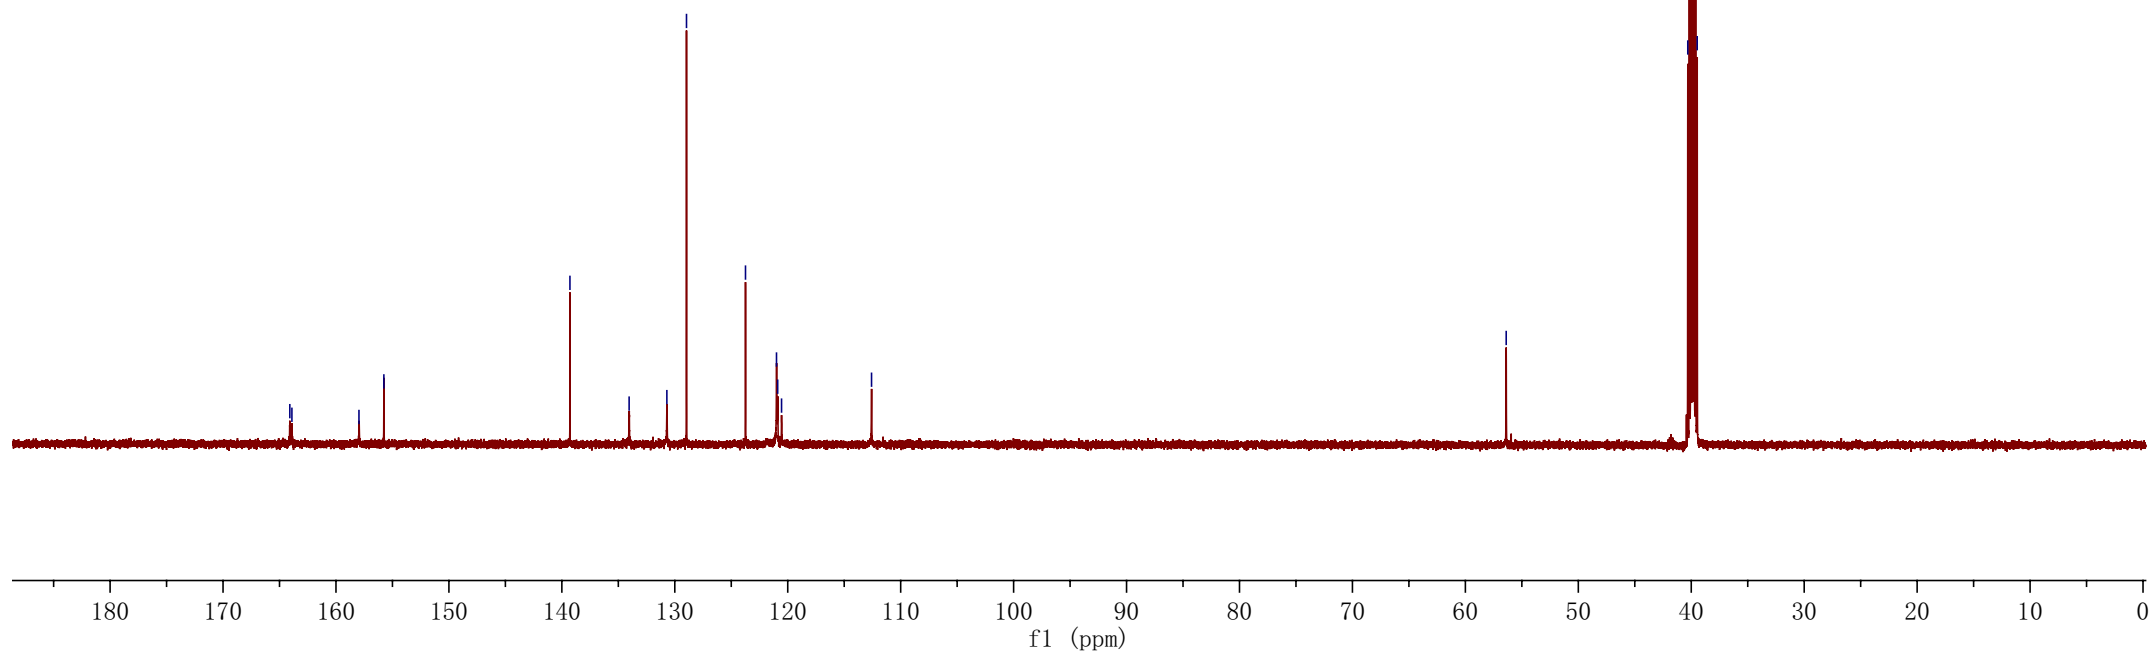

151022  
ZM151019-a DMSO

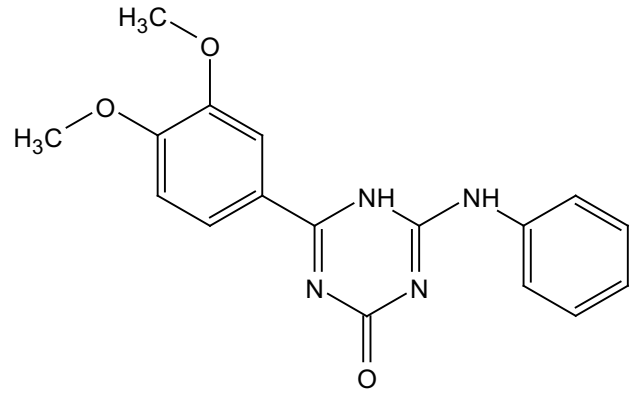

**3e**

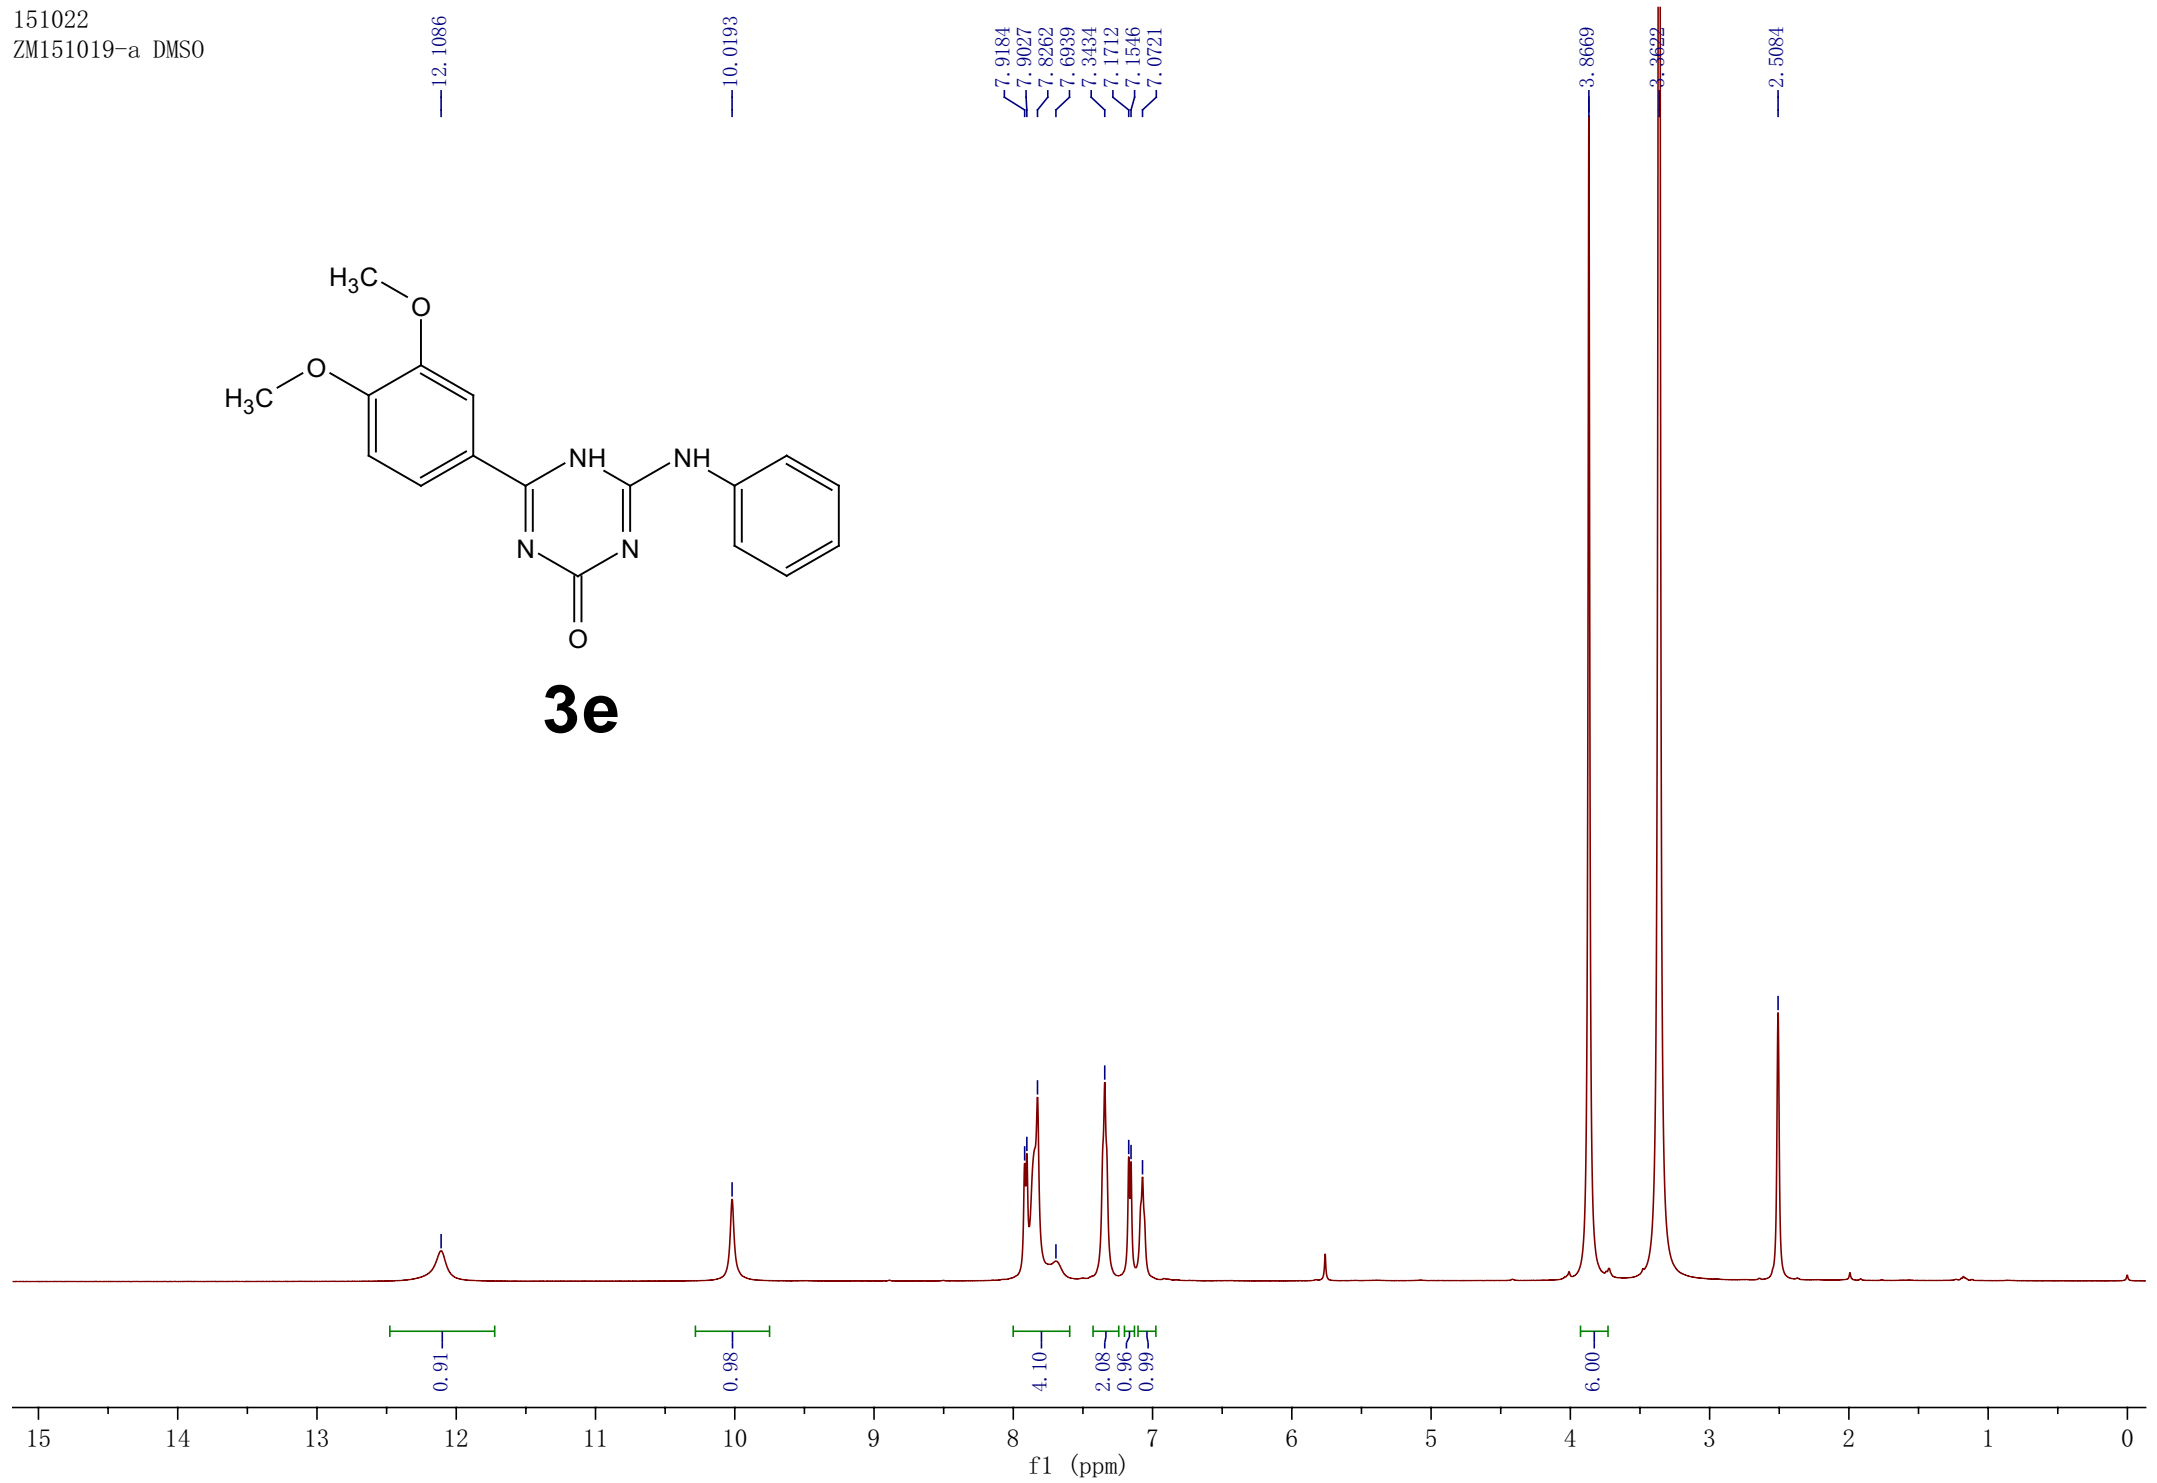

151026  
ZM151019-a DMSO

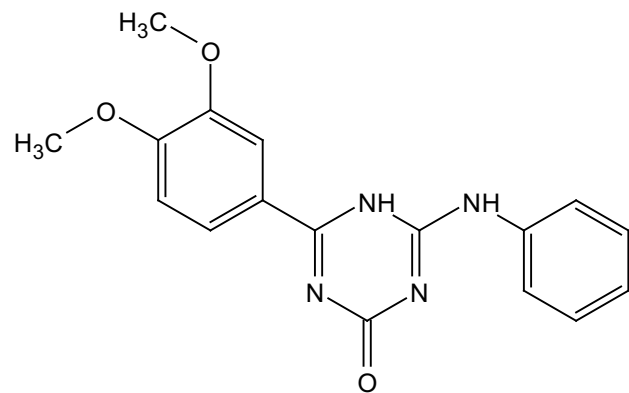

**3e**

163.6978  
163.6551  
161.3464

152.9703

148.5966

139.0267

128.4663

123.1511

121.9636

120.6001

120.5591

111.4136

110.7746

55.8002  
55.7339

40.0263

39.8592

39.6922

39.5252

39.3582

39.1913

39.0242

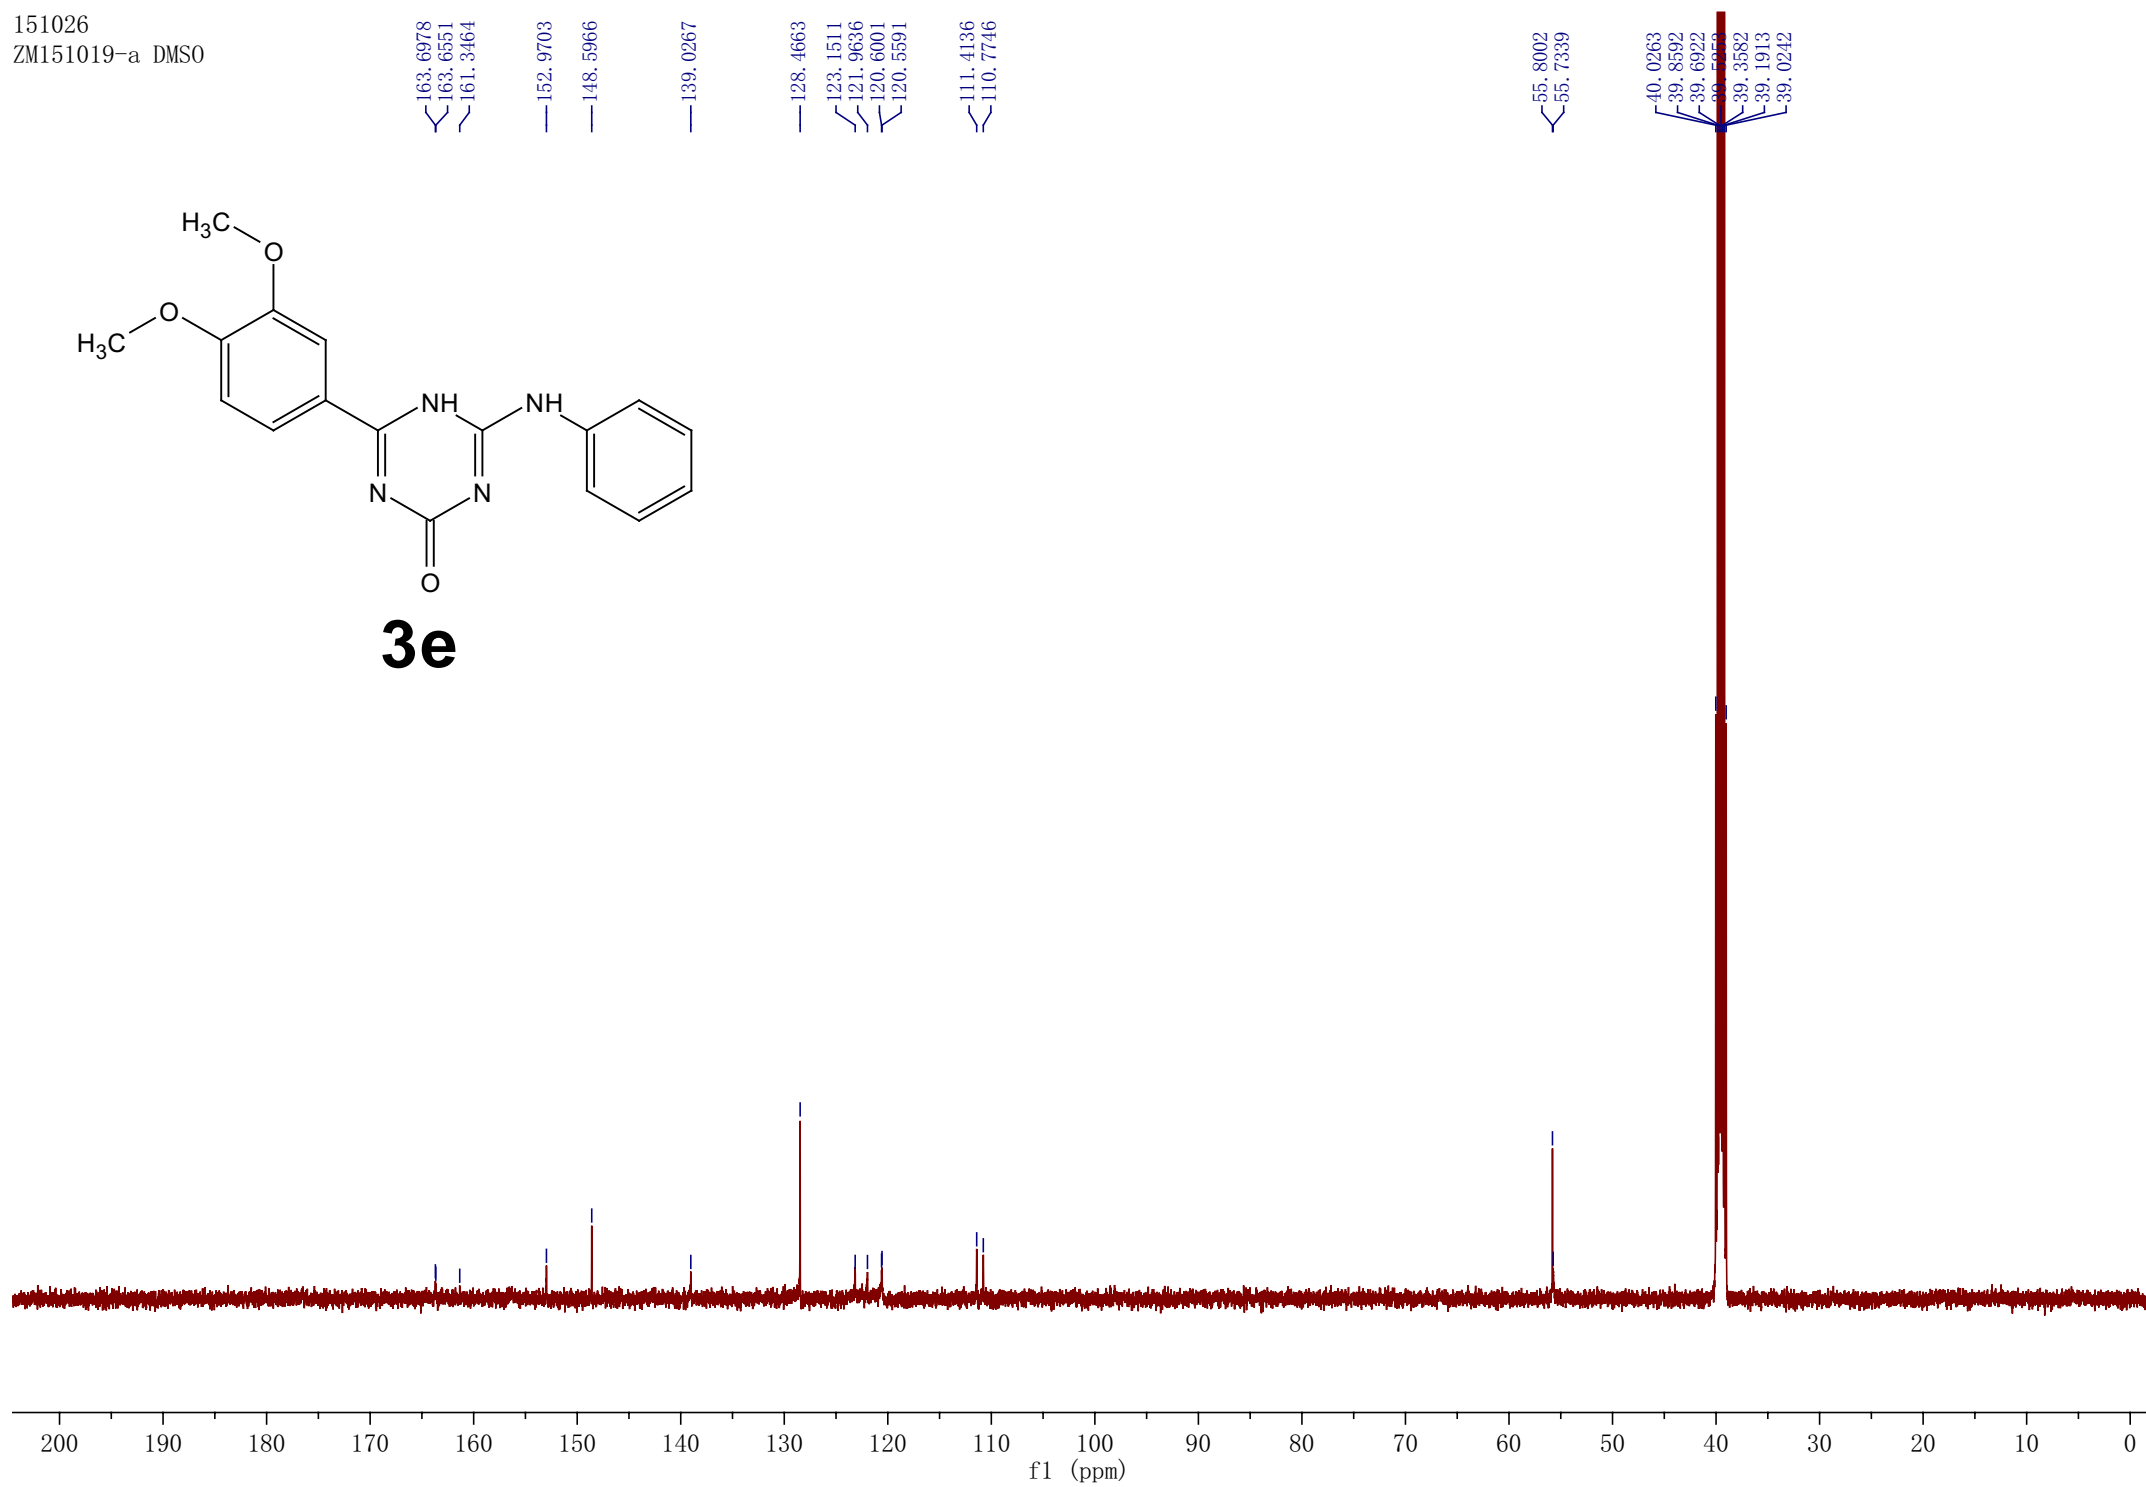

151224  
ZM151219-a DMSO

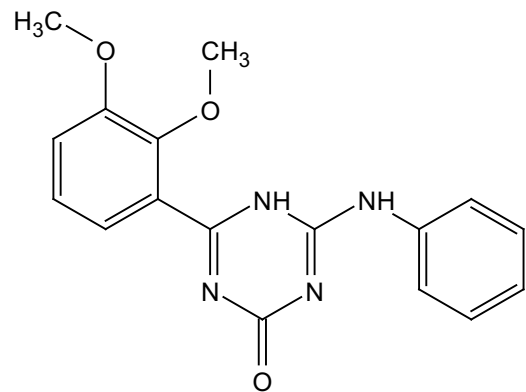

**3f**

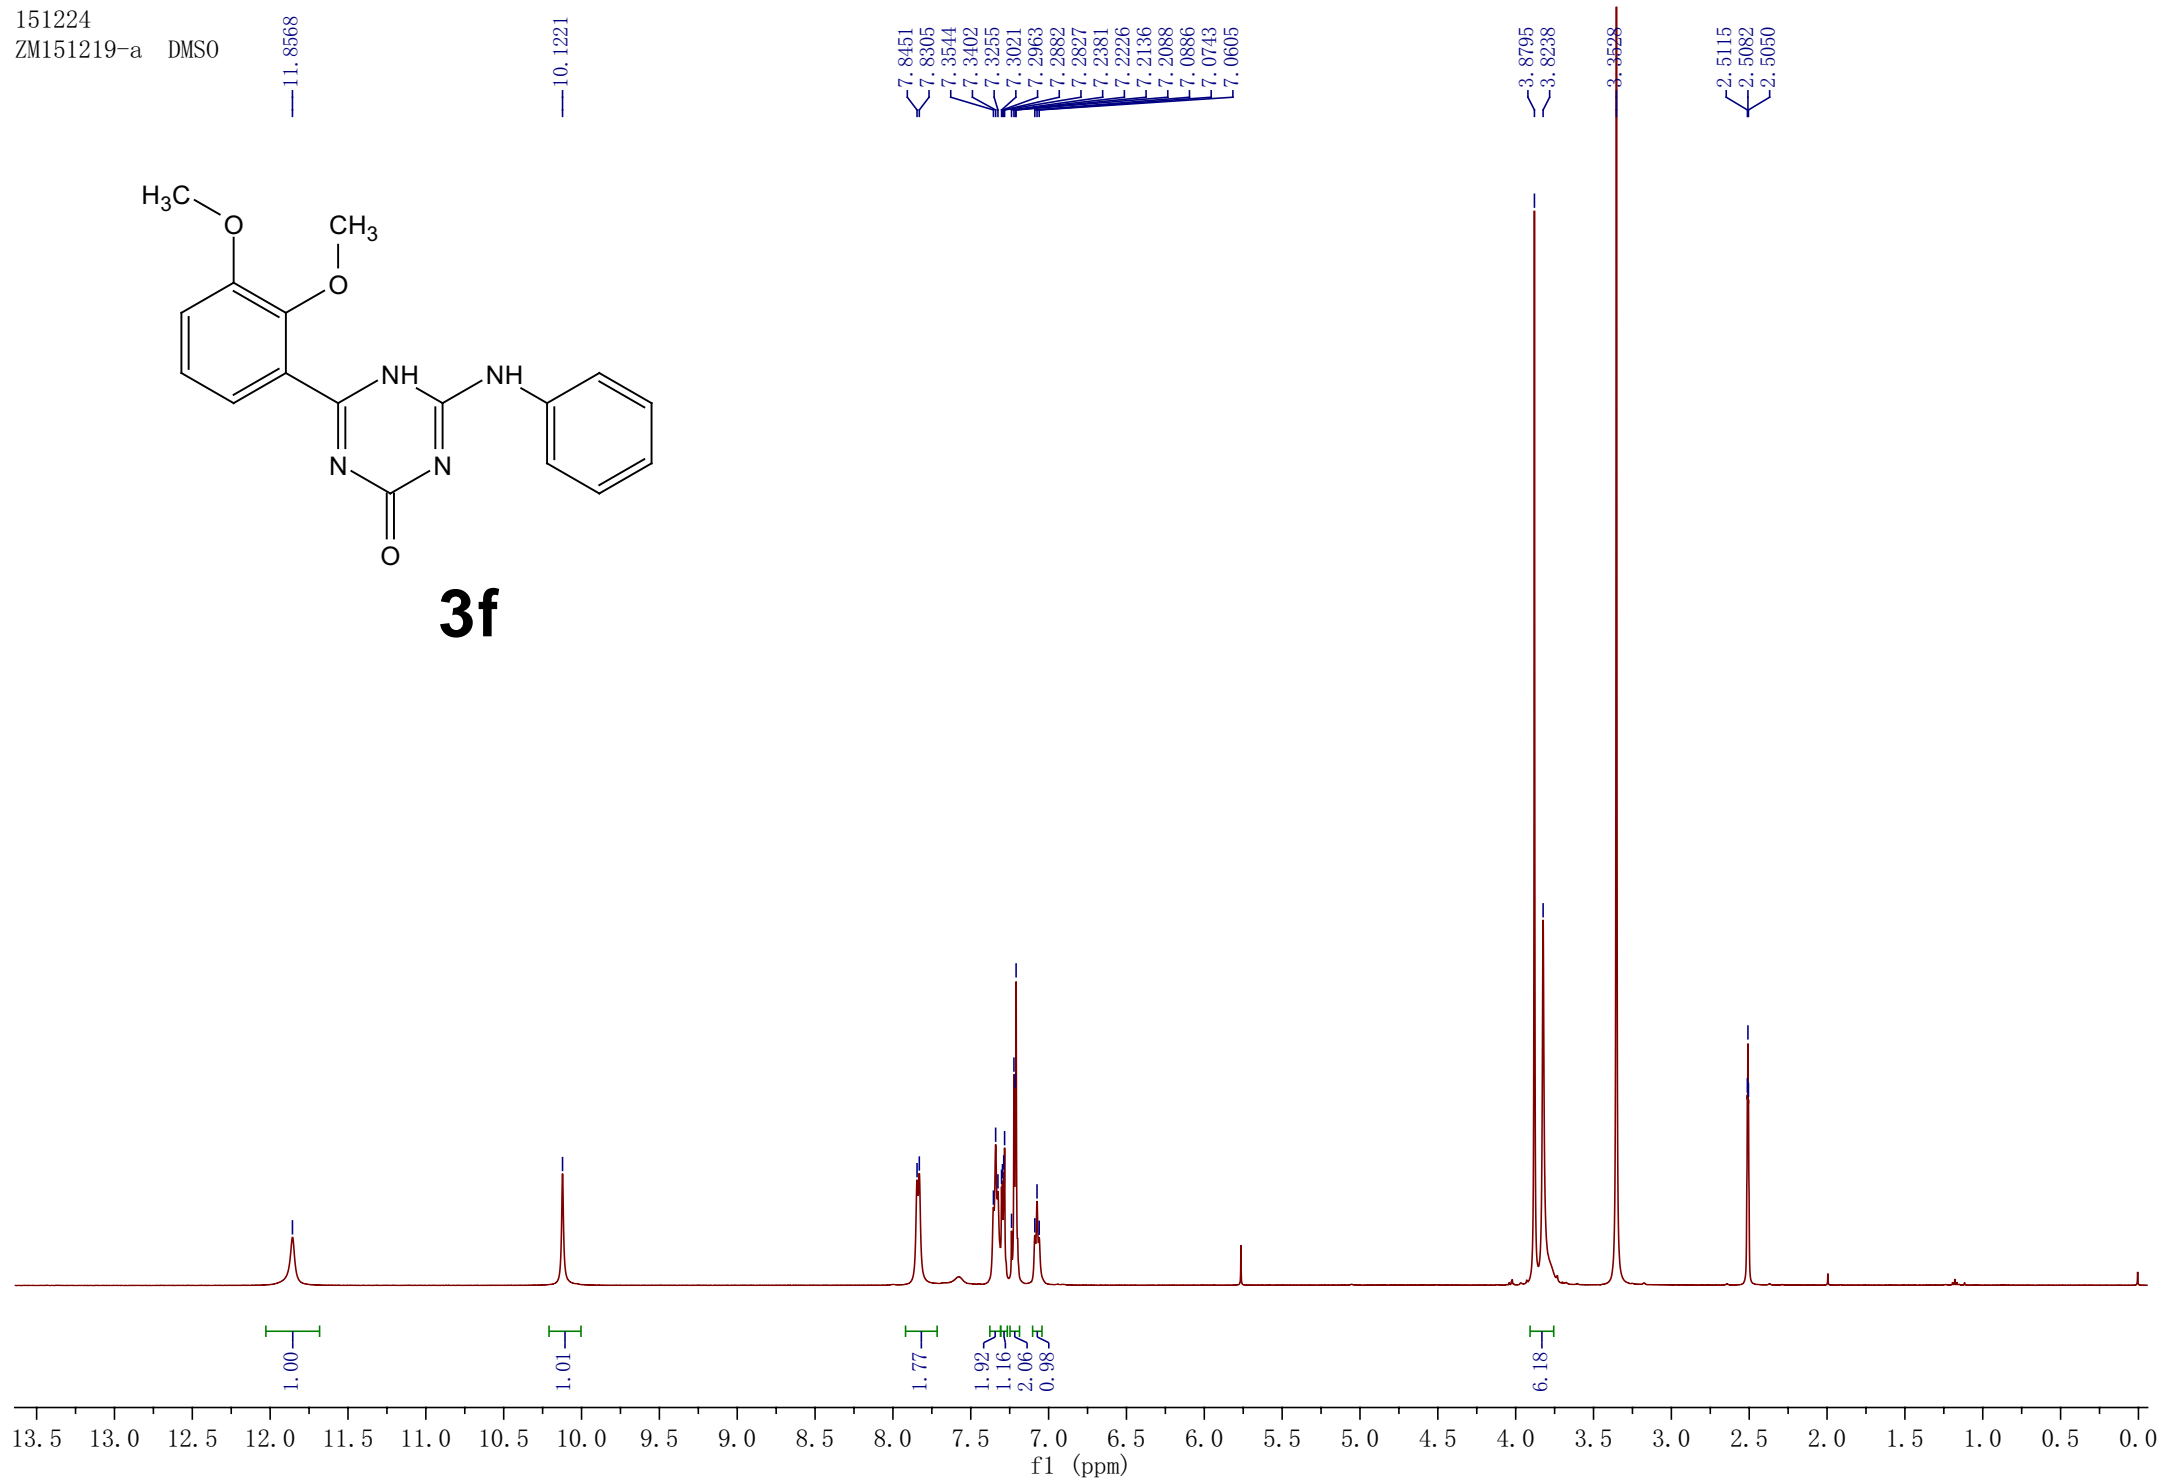

ZM151219-a

164.2098  
163.9254  
155.6455  
152.8749  
147.3730  
139.2742  
128.9418  
126.8504  
124.6364  
123.7787  
121.3792  
121.0802  
116.5656

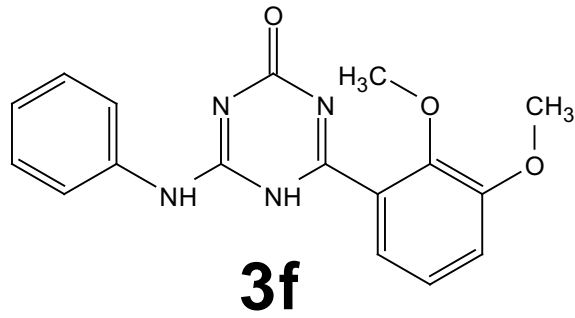

61.6630  
56.5526  
40.3985  
40.2315  
40.0645  
39.8977  
39.7307

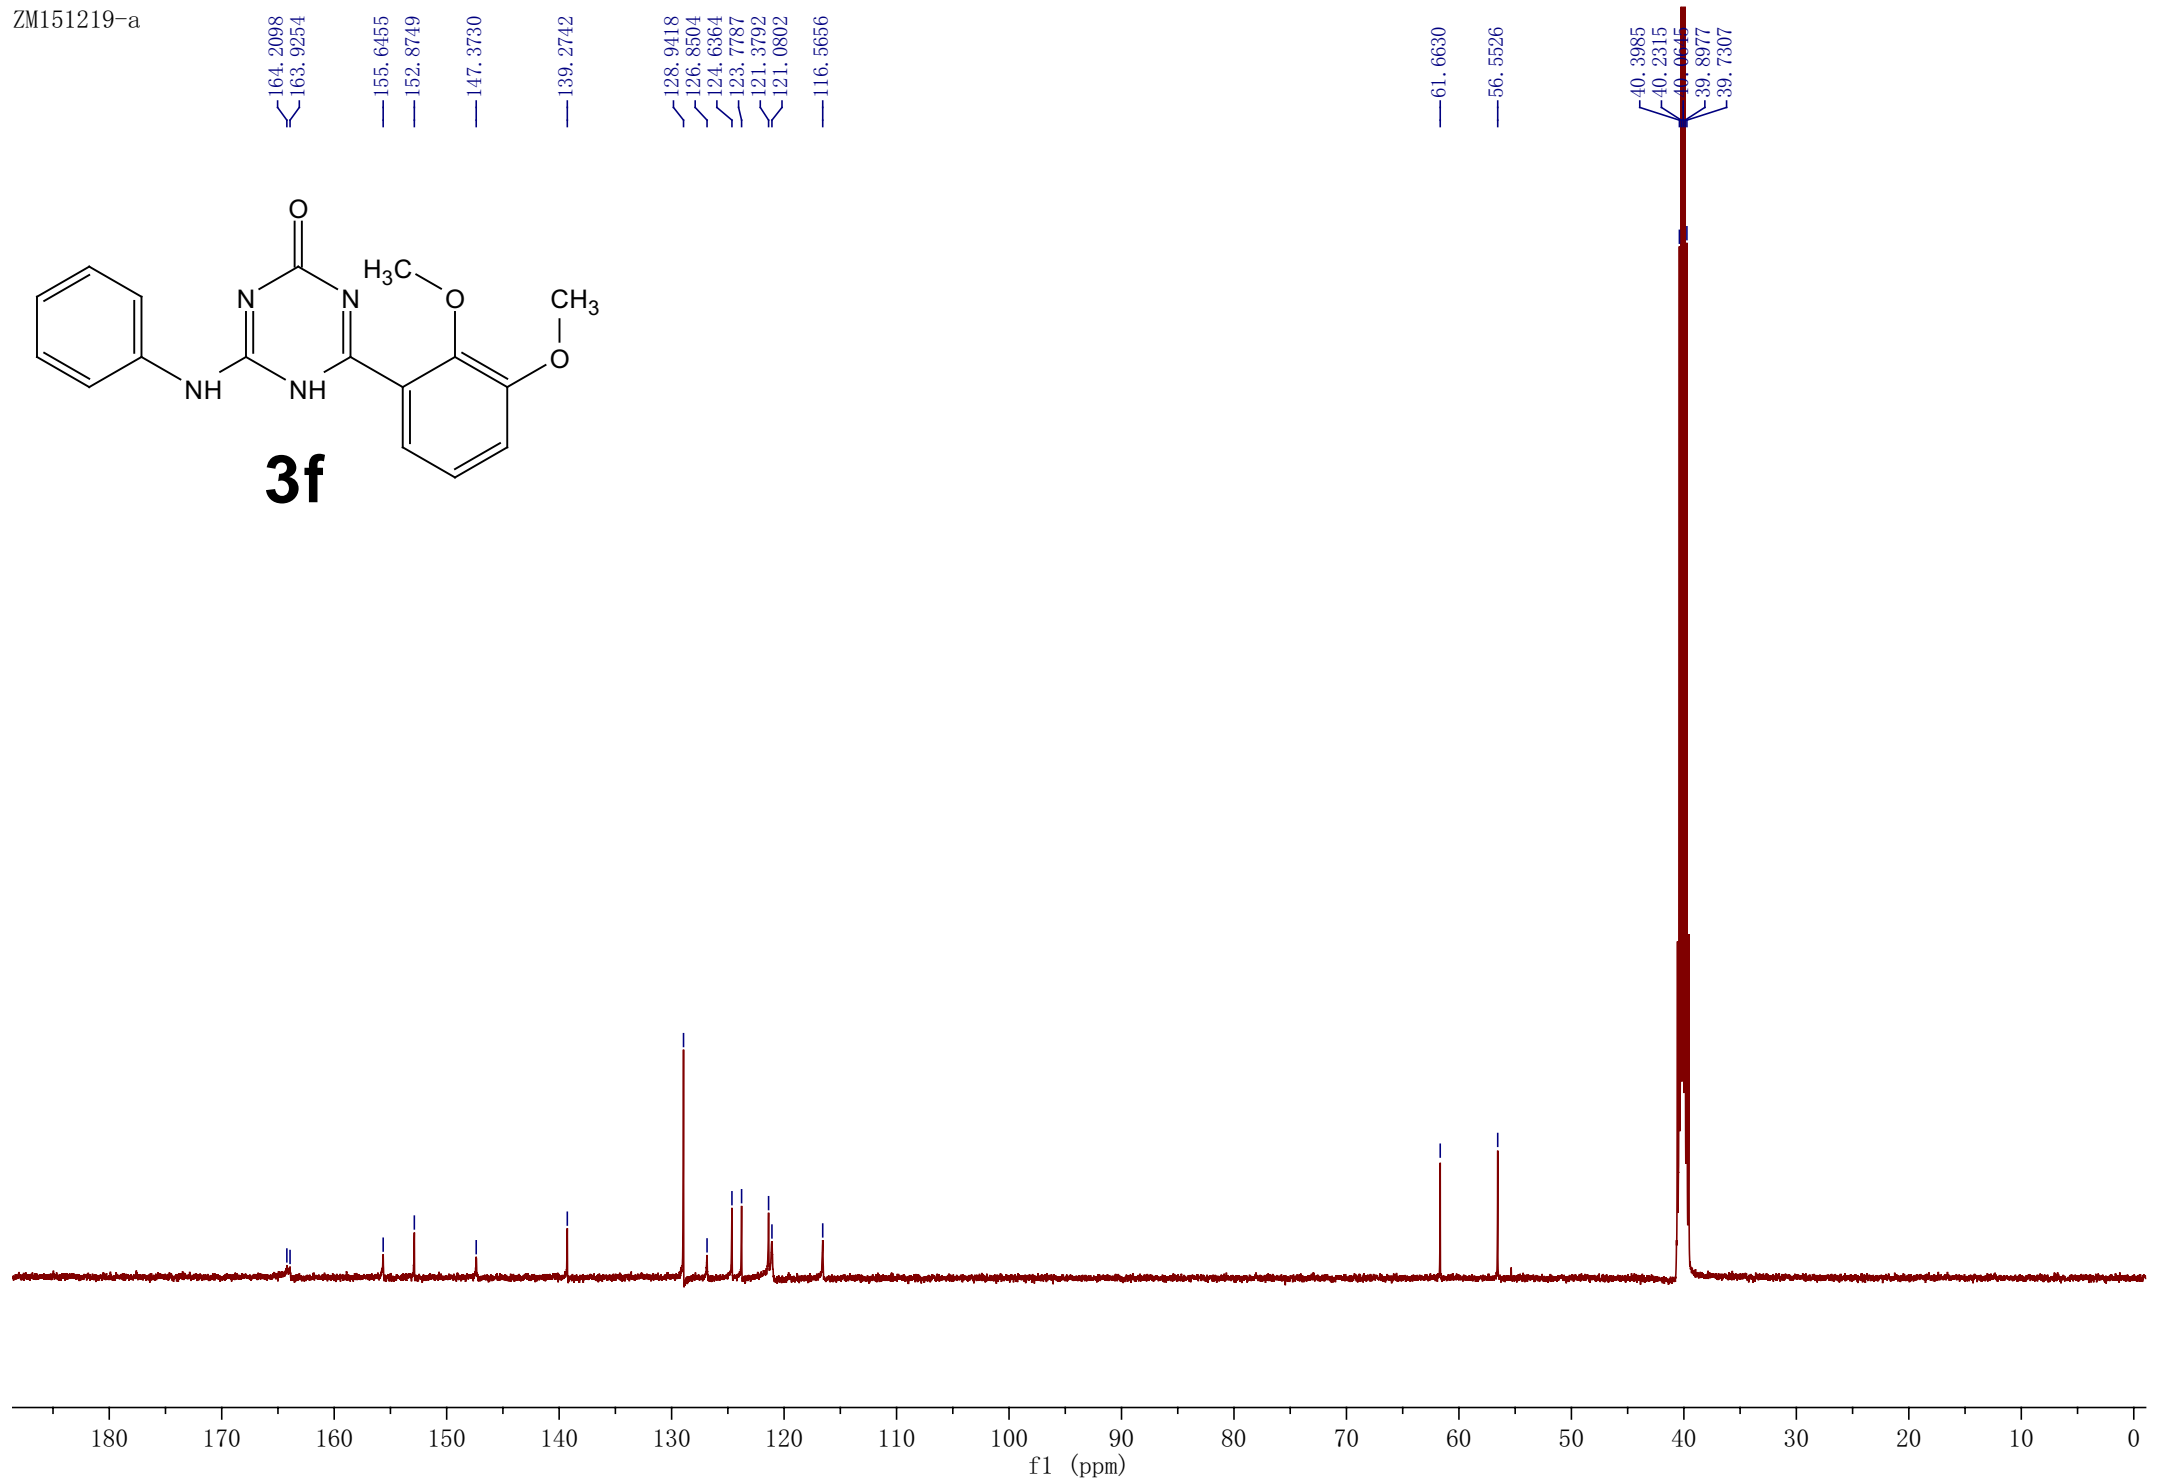

170613  
ZM170328-a DMSO-  
0613

12.0693

10.0133

7.8700  
7.8543  
7.7373  
7.3449  
7.1360  
7.1200  
7.0749

6.1767

3.3441

2.5084

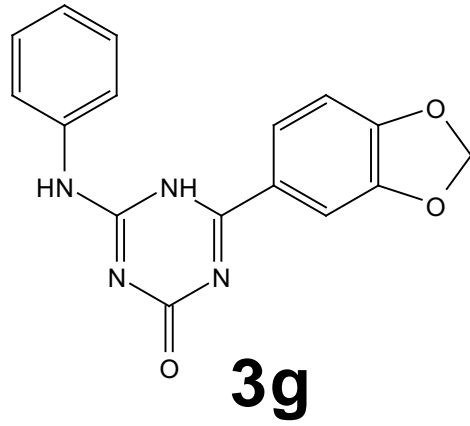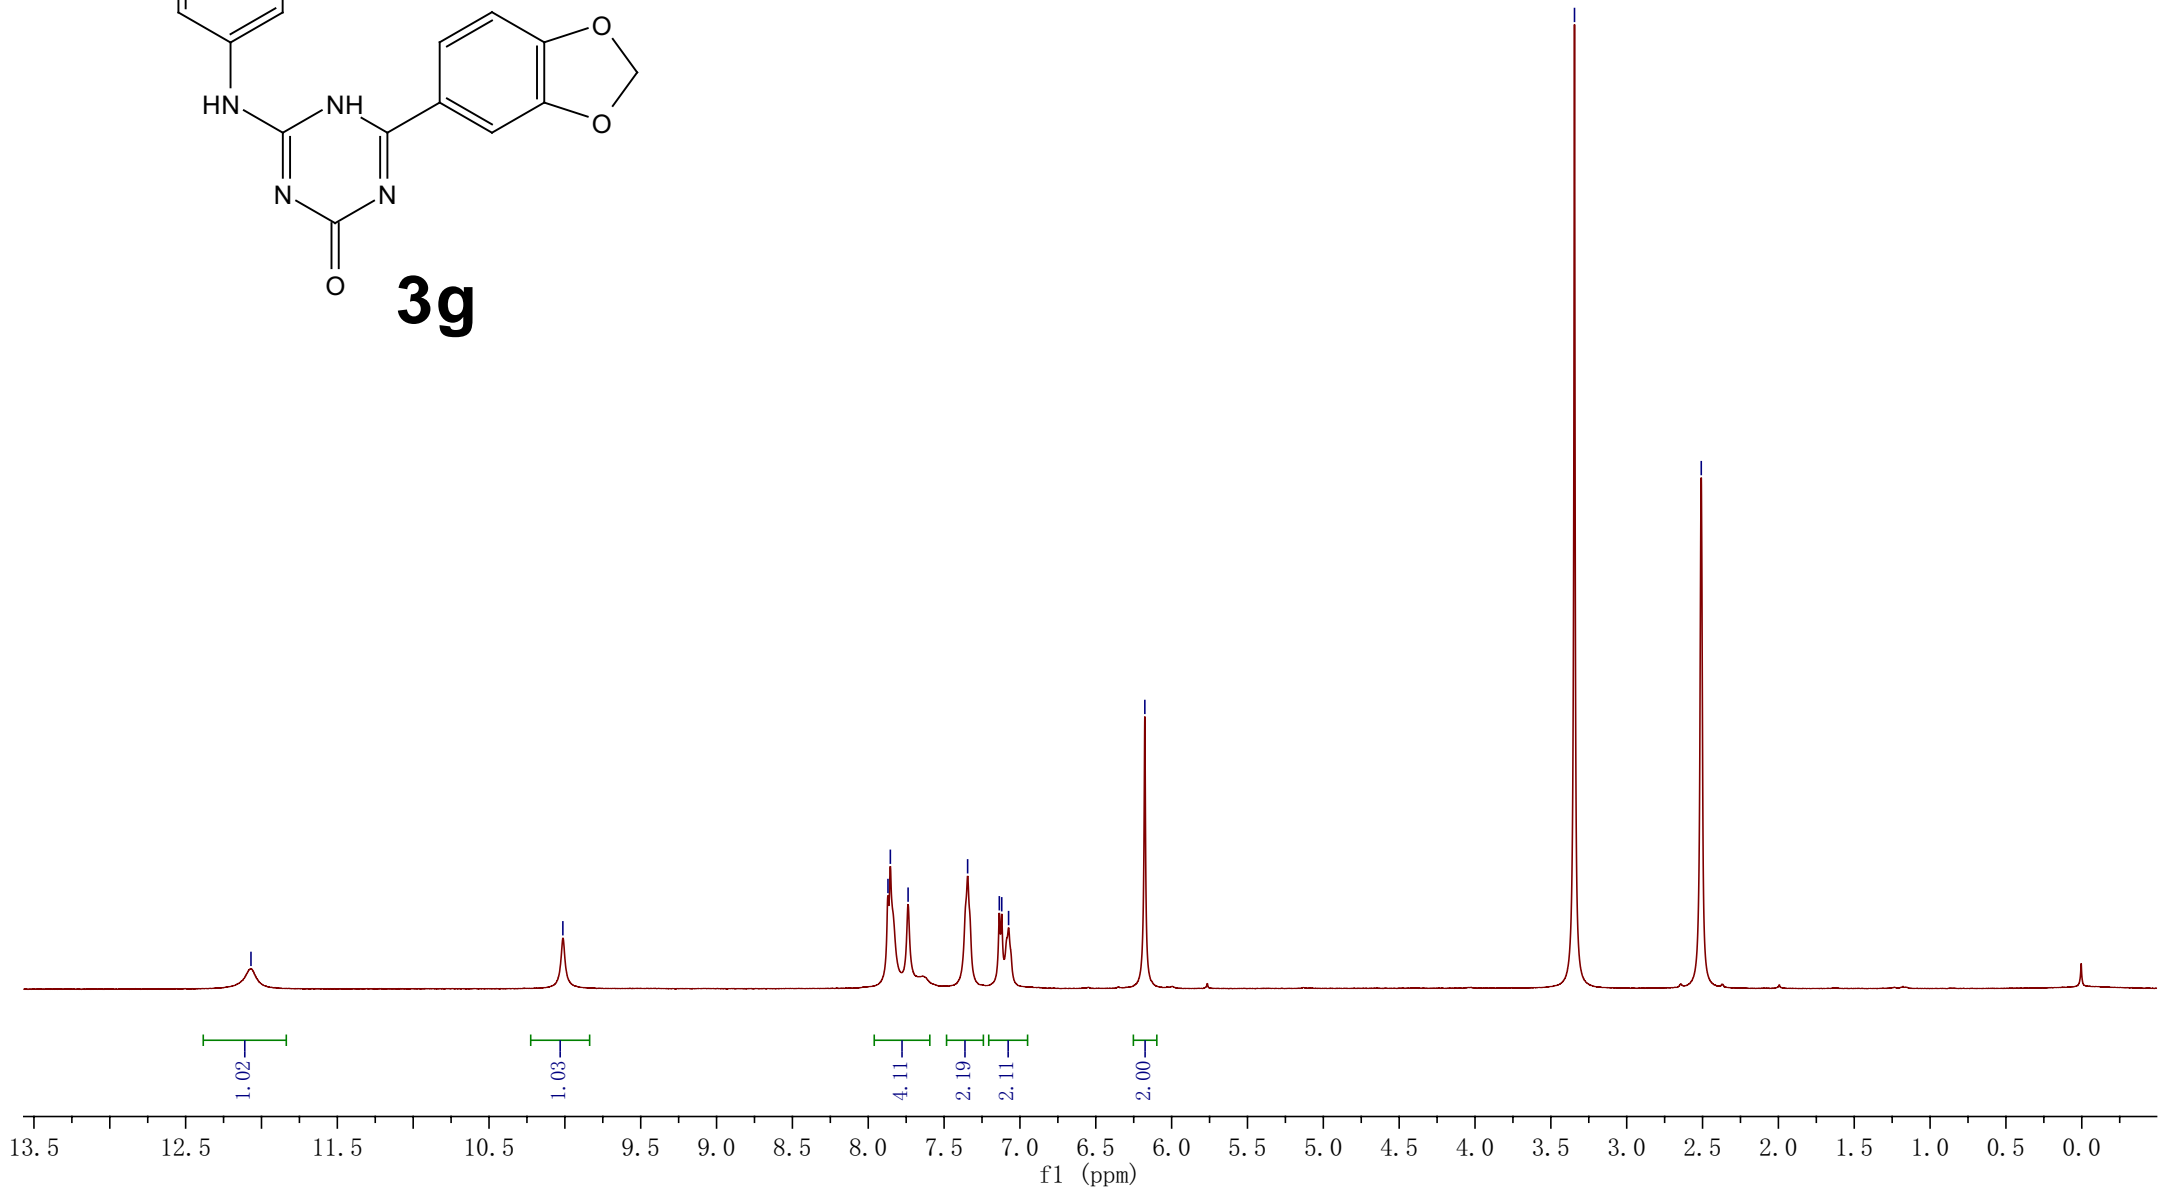

20170926-C13-WHF-ZM-170328

20170926-C13-WHF-ZM-170328

DMSO

164.4425  
163.5725

156.3125

151.9580

148.2695

139.3822

128.9814

124.7407

124.2446

123.7031

121.0131

108.9230

108.0032

102.6865

40.3398

40.2010

40.0620

39.6999

39.7838

39.6447

39.5057

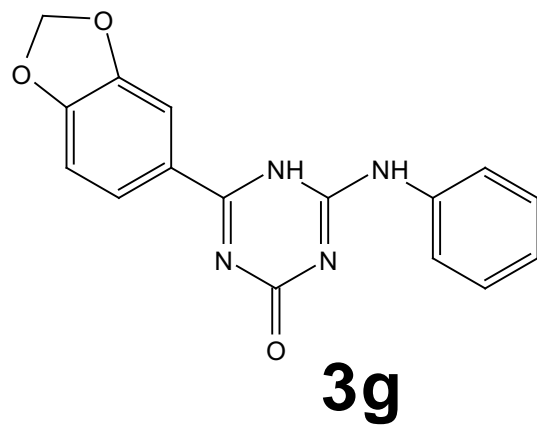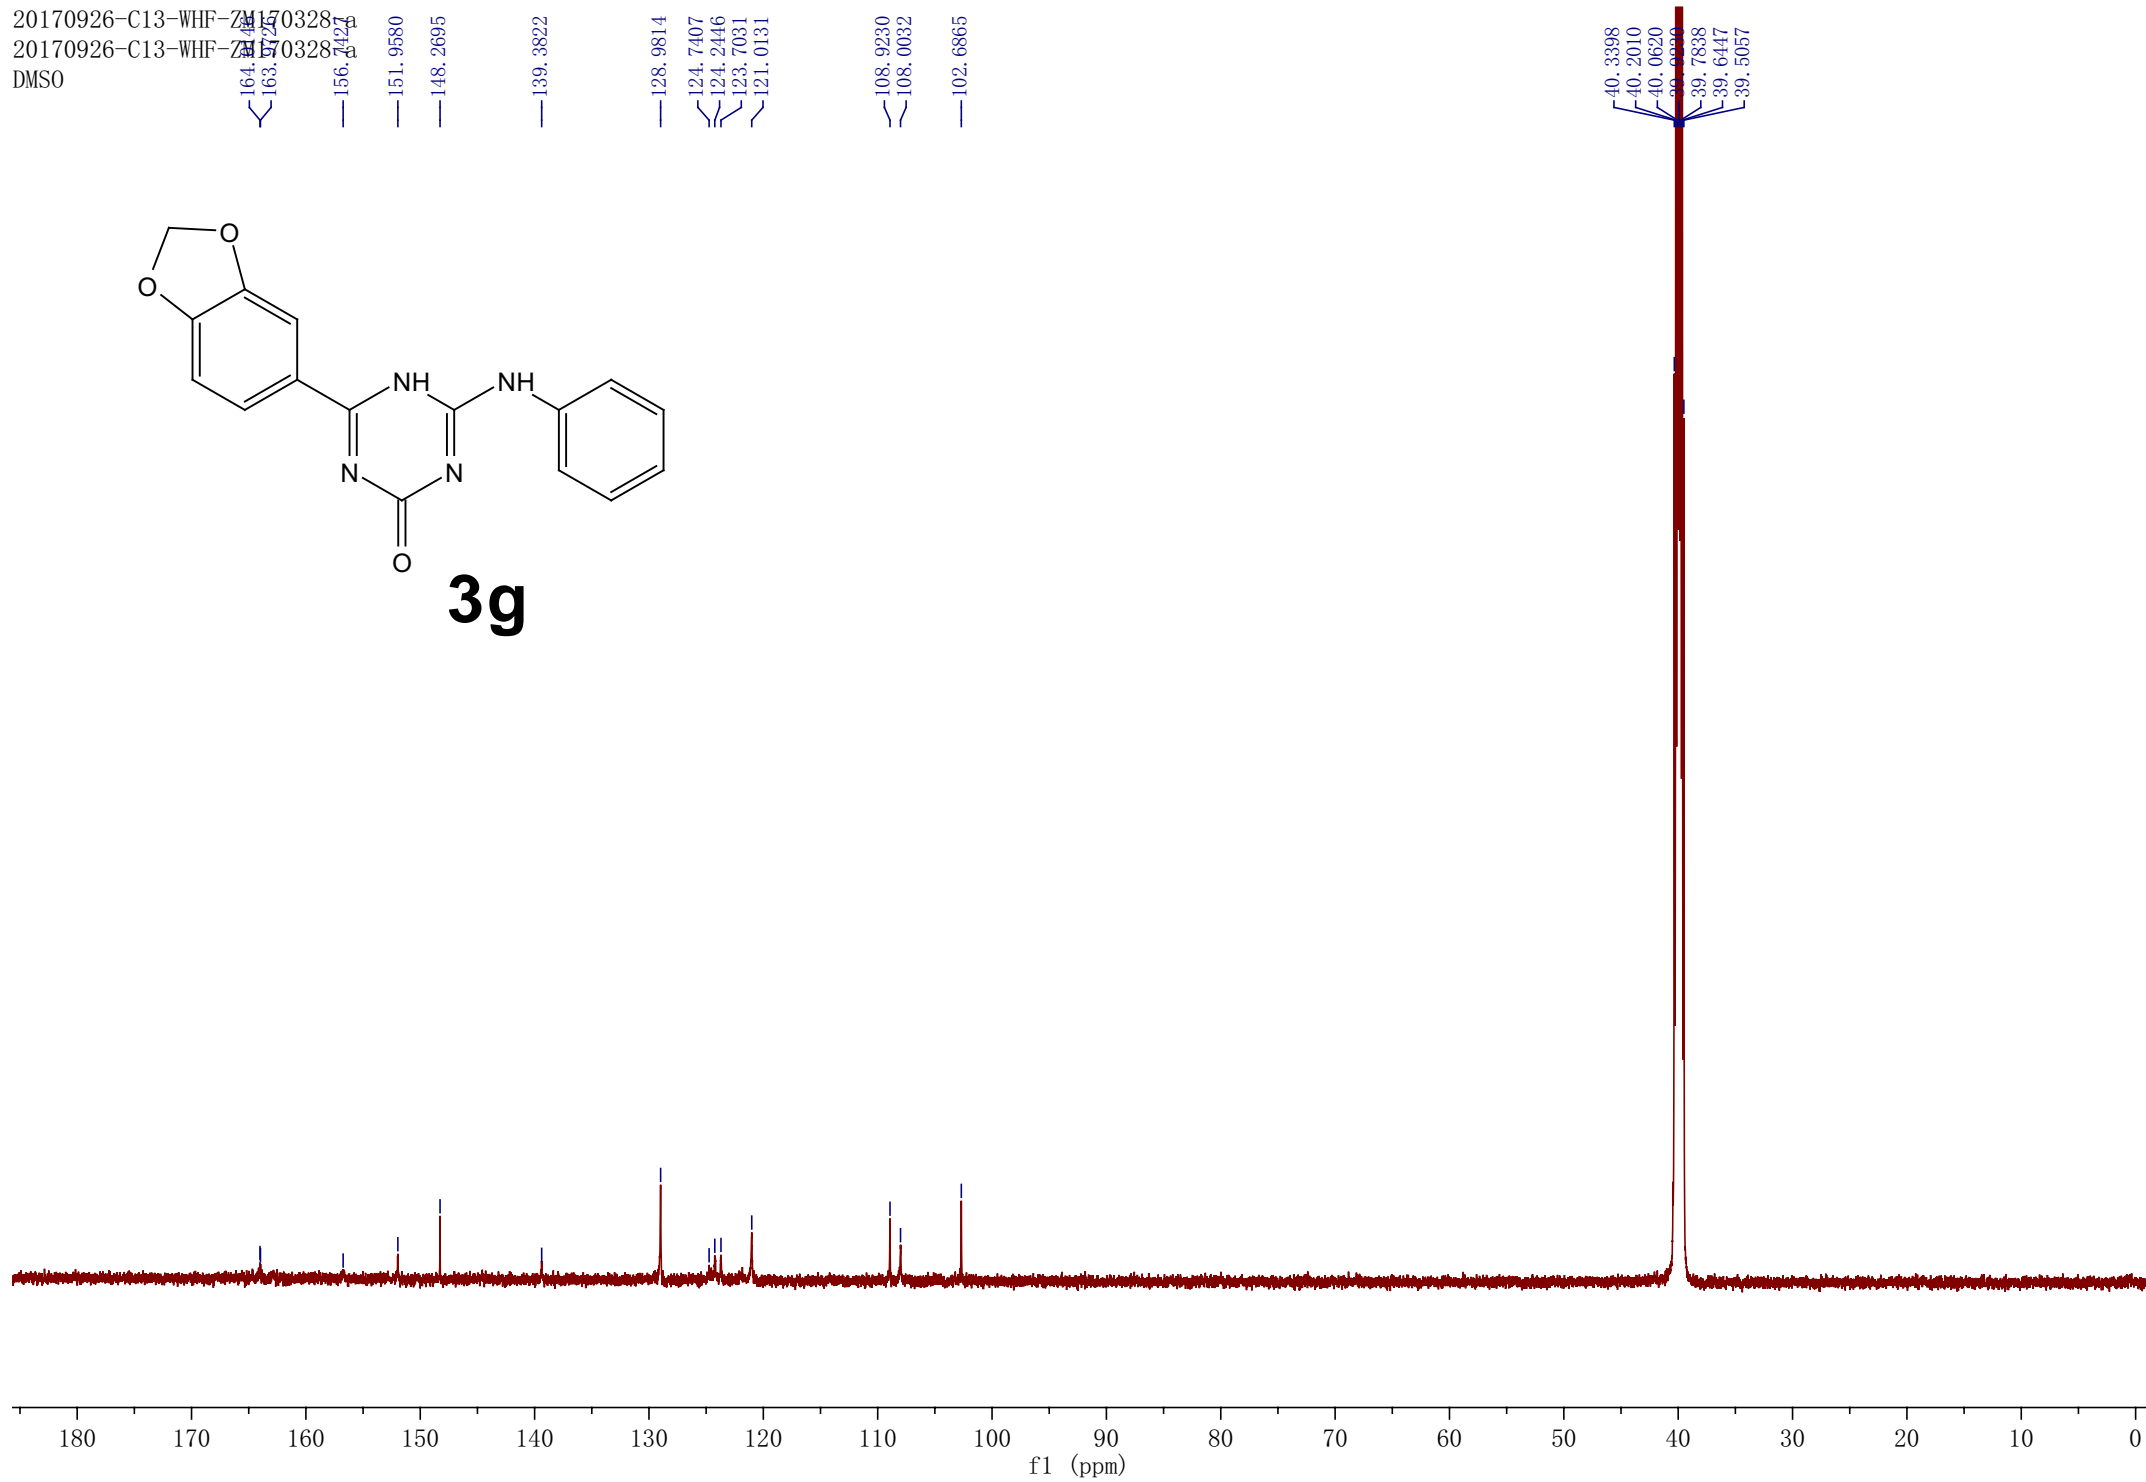



170920  
ZM170918-a DMSO

12.3310

10.1596

8.2550  
8.1599  
8.1457  
7.8496  
7.7452  
7.6409  
7.6259  
7.6138  
7.3604  
7.0960

3.3486

2.5108

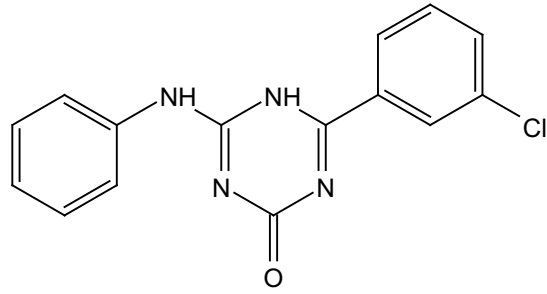

**3h**

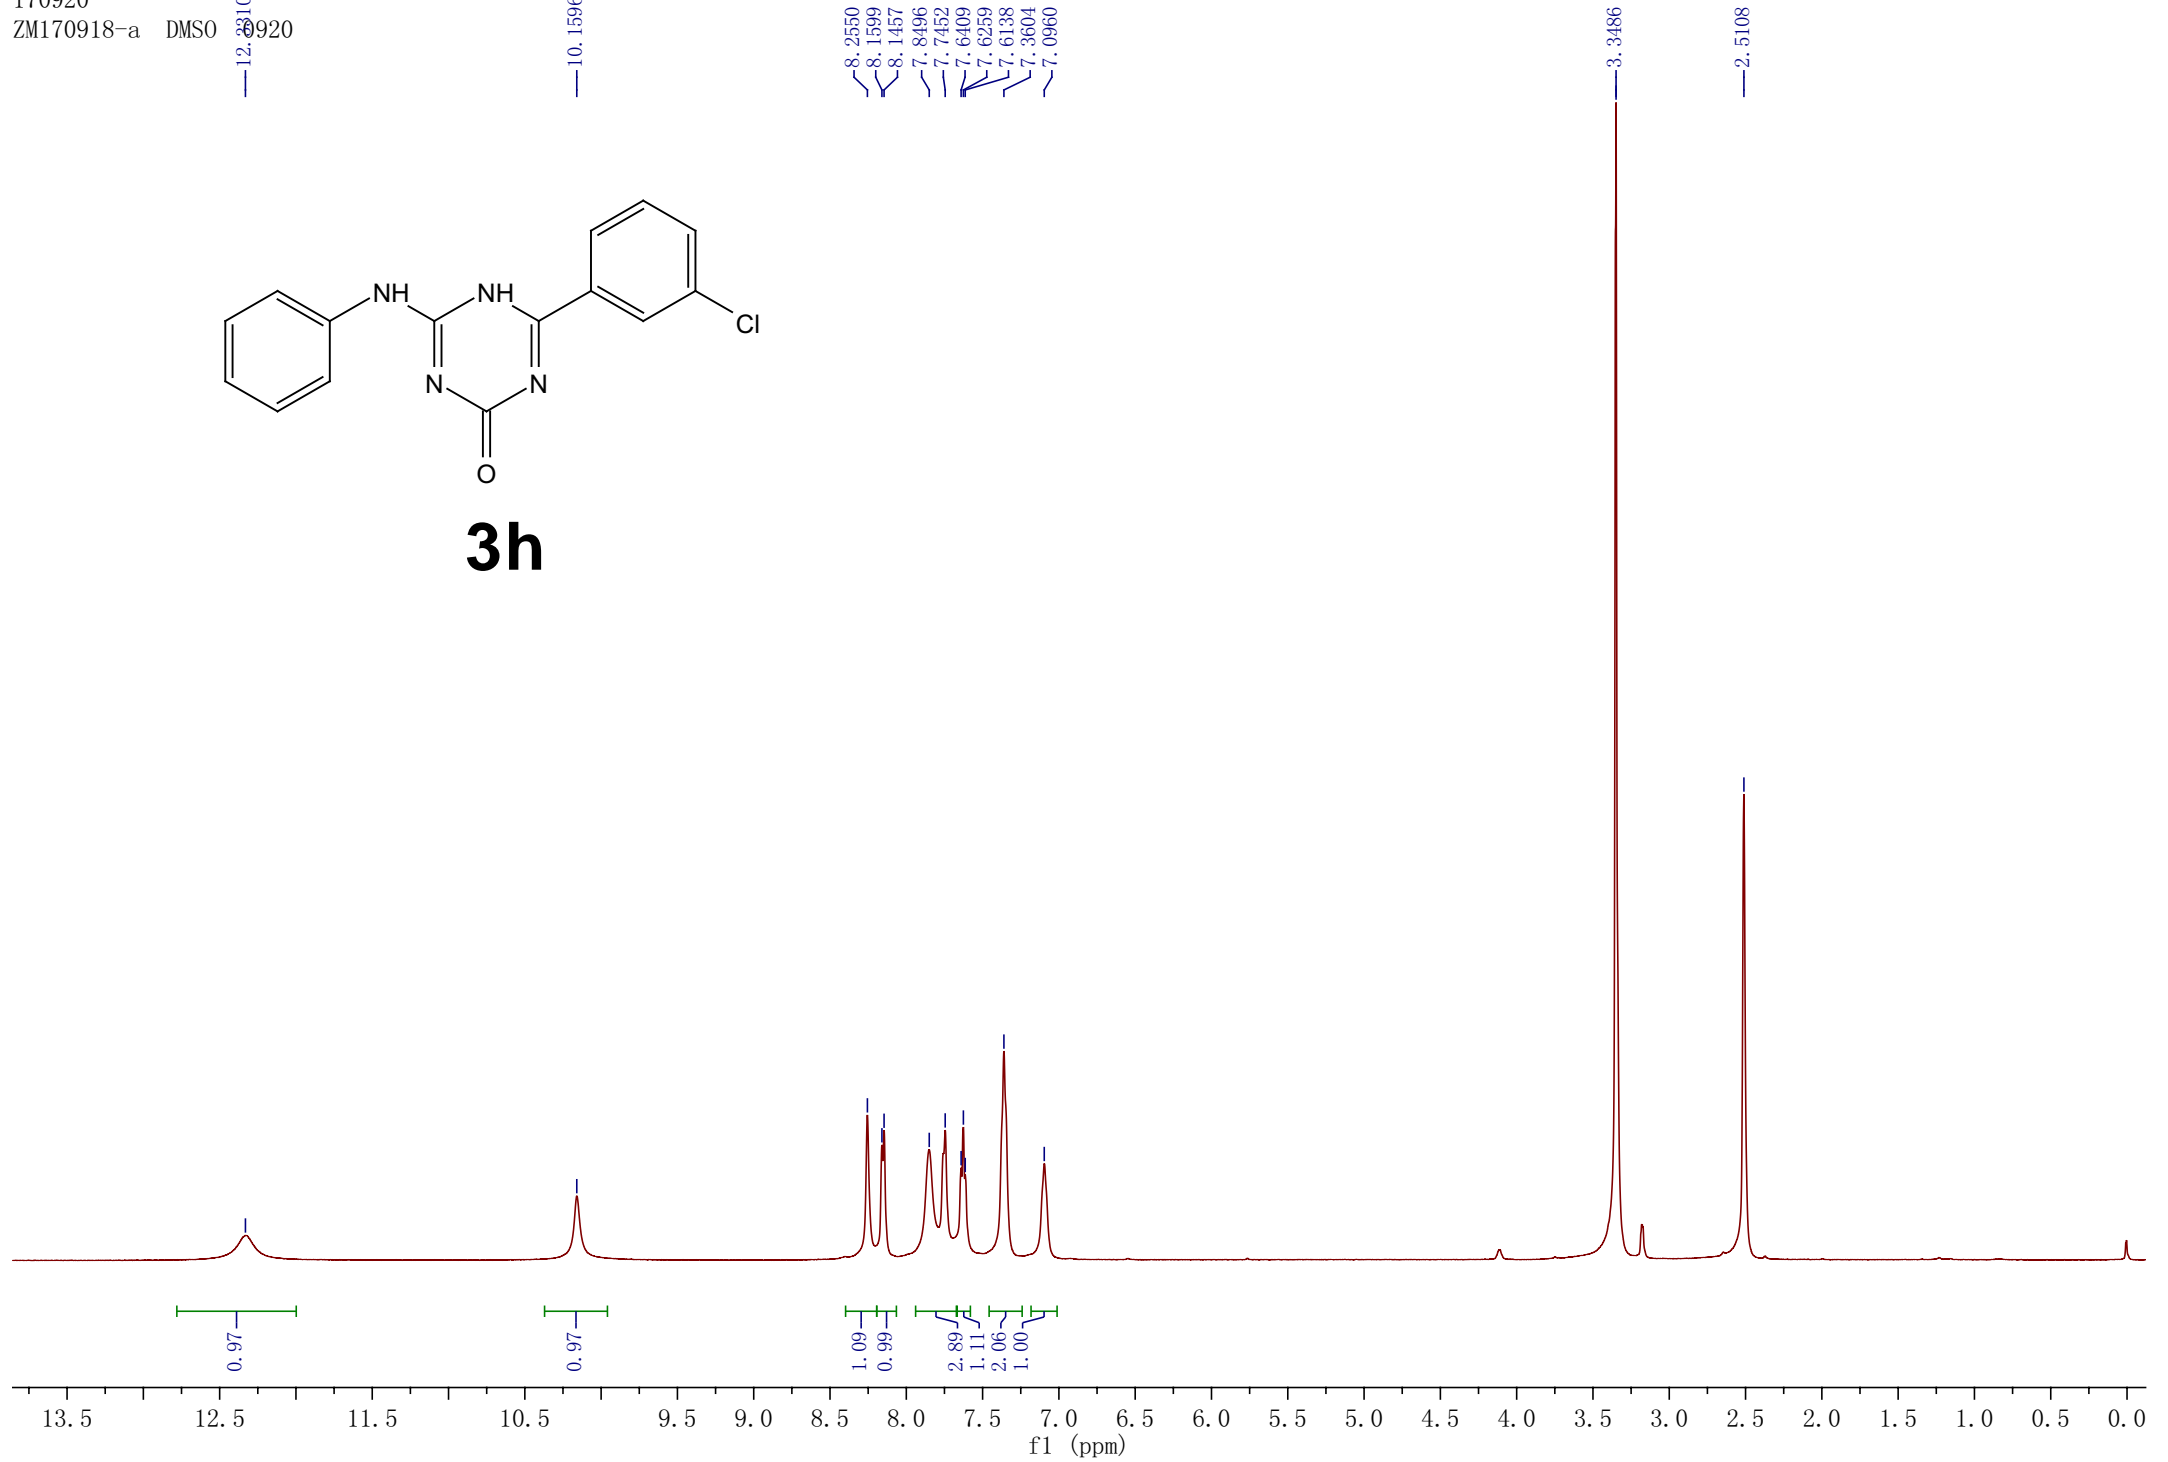

ZM170918-a

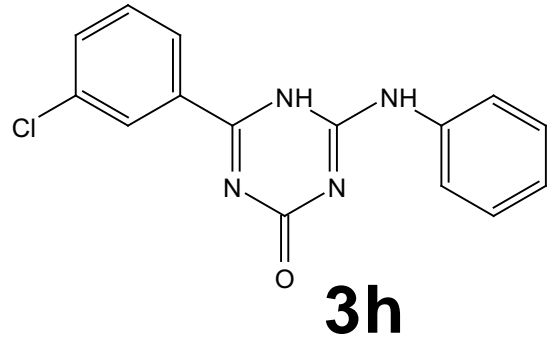

164.1148  
163.4855

157.1022  
155.3967

138.9440

134.2397  
132.8003

130.6685  
128.7604

128.4249  
126.9189

123.8679  
121.4338

79.3928  
79.1295  
78.8665

40.7277  
40.5598  
40.3935  
40.2272  
39.0591  
39.8920  
39.7248

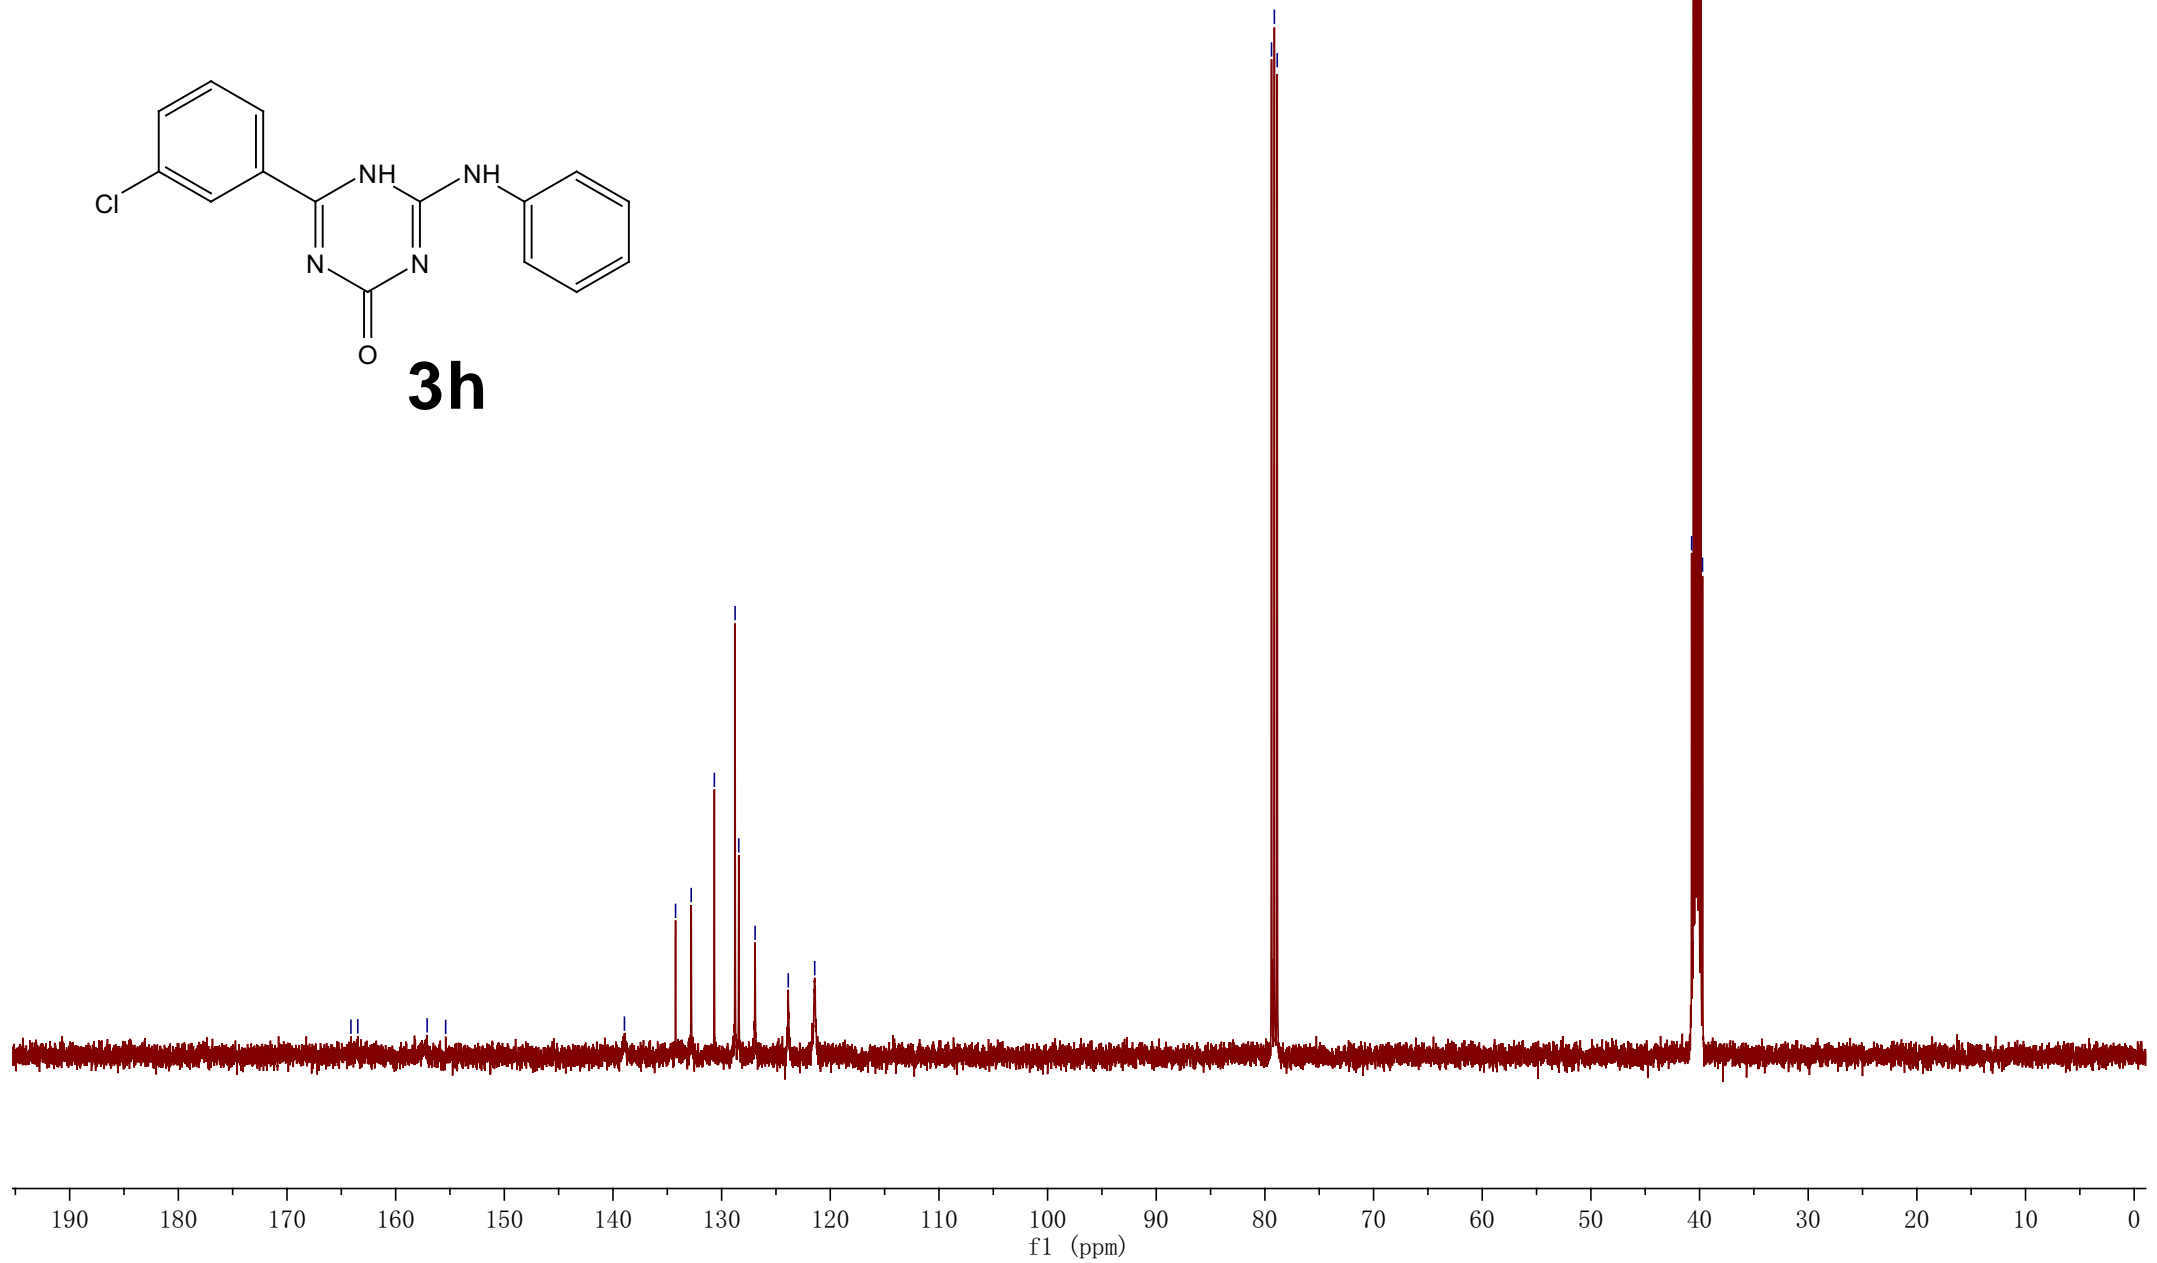

Supplement: c8nj02035c1.pdf [file c8nj02035c1.pdf]
